# Supplementary material for: A new cost-effective Ru-chloramphenicol base derivative catalyst for the asymmetric transfer hydrogenation/dynamic kinetic resolution of N-Boc α-amino-β-ketoesters and its application to the synthesis of the chiral core of vancomycin
Source: Royal Society of Chemistry journal article supplement (doi:10.1039/c6ra05109j), 2016-01-01

## Supporting information

A new cost-effective Ru-chloramphenicol base derivative catalyst for the asymmetric transfer hydrogenation/dynamic kinetic resolution of *N*-Boc  $\alpha$ -amino- $\beta$ -ketoesters and its application to the synthesis of the chiral core of vancomycin

Xinlong Wang,<sup>[a]</sup> Lingjun Xu,<sup>[a]</sup> Fangjun Xiong,<sup>[a]</sup> Yan Wu<sup>\*[a]</sup> and Fener Chen<sup>\*[a]</sup>

Department of Chemistry, Fudan University, 220 Handan Road, Shanghai, 200433, People's Republic of China

\* E-mail: rfchen@fudan.edu.cn (Fener Chen)

\* E-mail: wywin8@163.com (Yan Wu).

### Spectral Data of the substrates 1a-m (<sup>1</sup>H NMR and <sup>13</sup>C NMR)

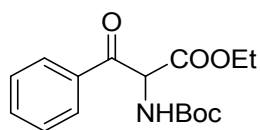

#### <sup>1</sup>H NMR

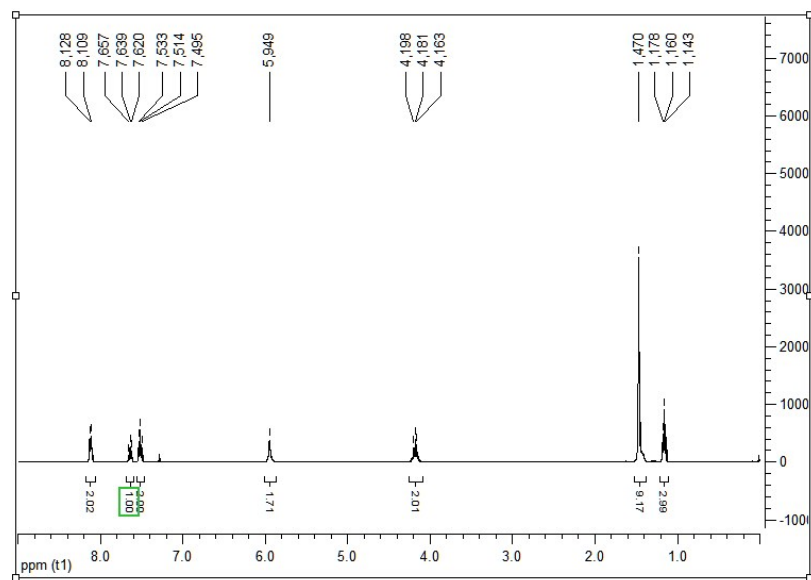

#### <sup>13</sup>C NMR

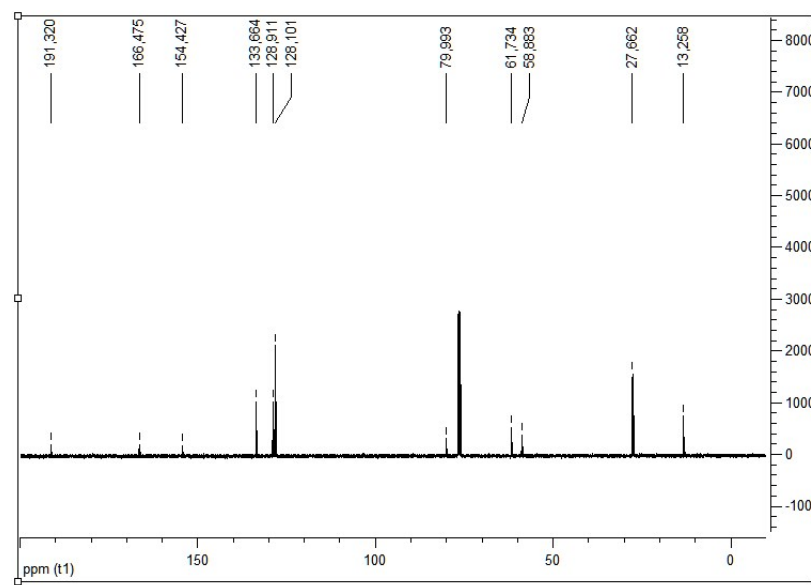

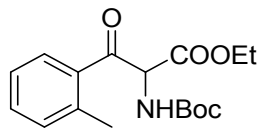

<sup>1</sup>H NMR

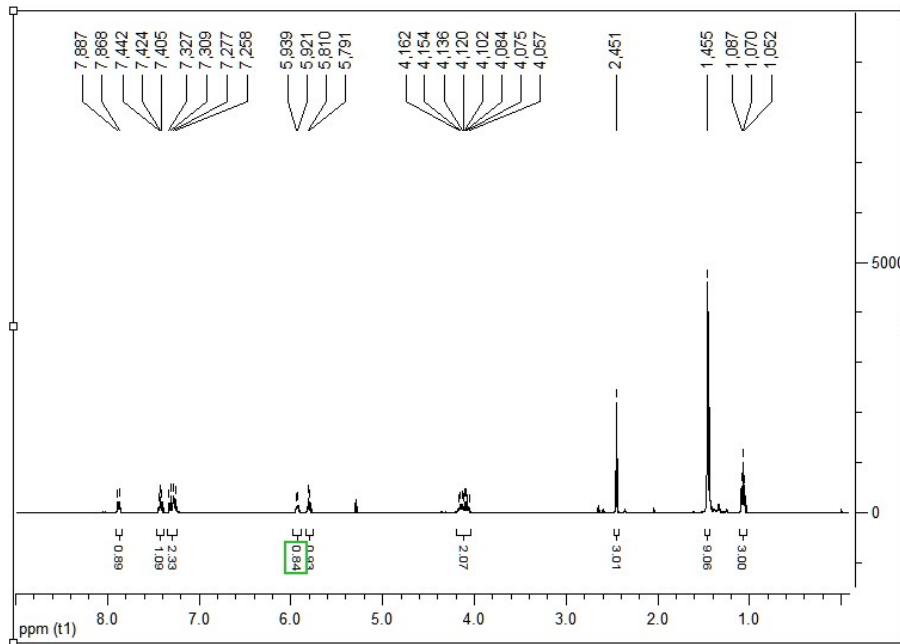

<sup>13</sup>C NMR

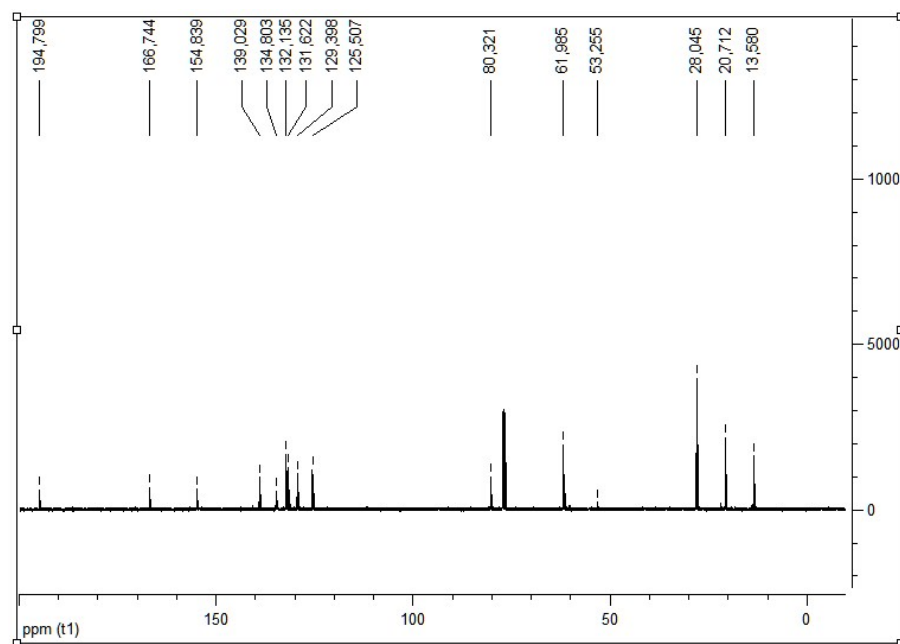

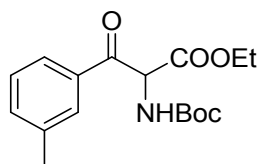

<sup>1</sup>H NMR

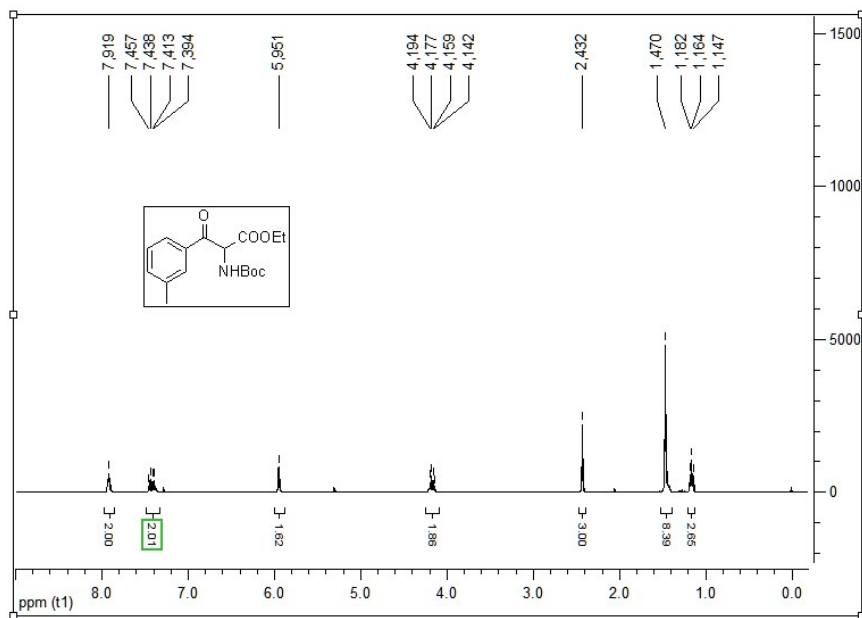

<sup>13</sup>C NMR

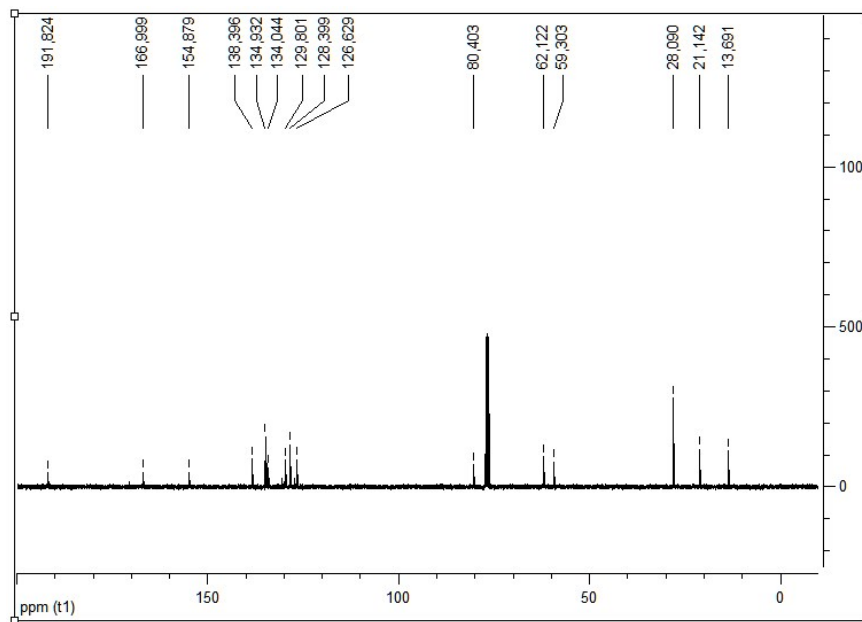

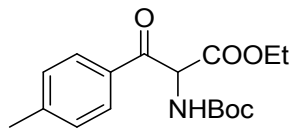

<sup>1</sup>H NMR

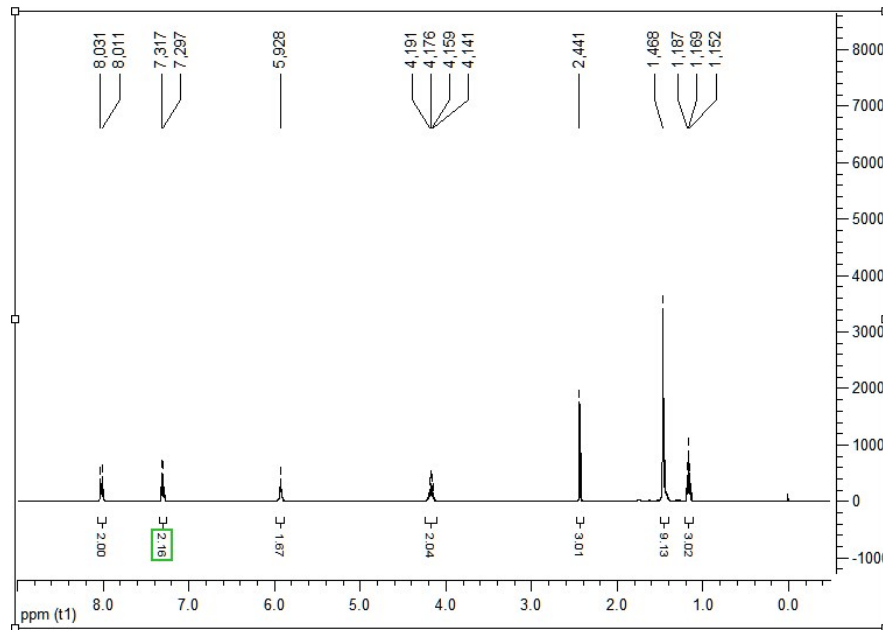

<sup>13</sup>C NMR

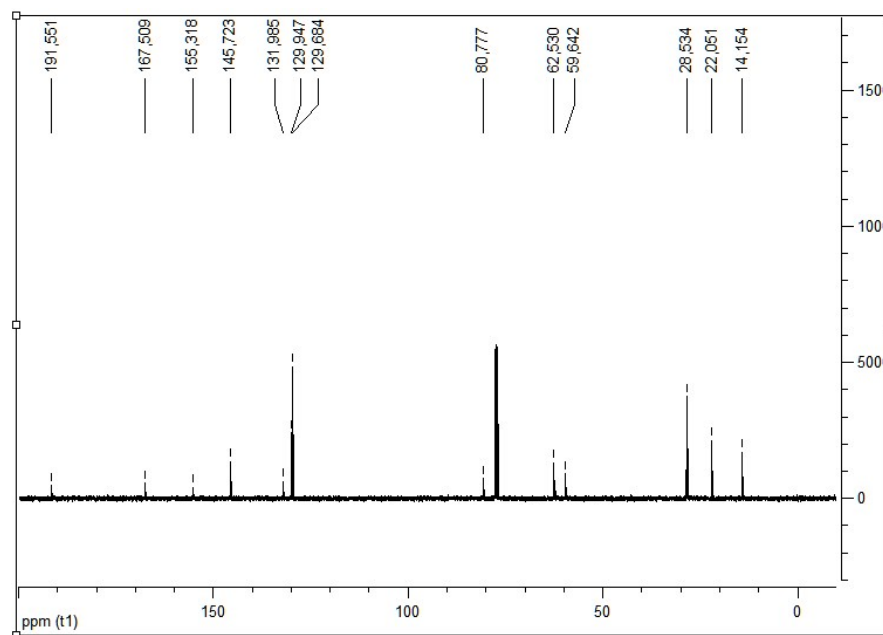

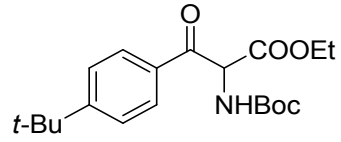

<sup>1</sup>H NMR

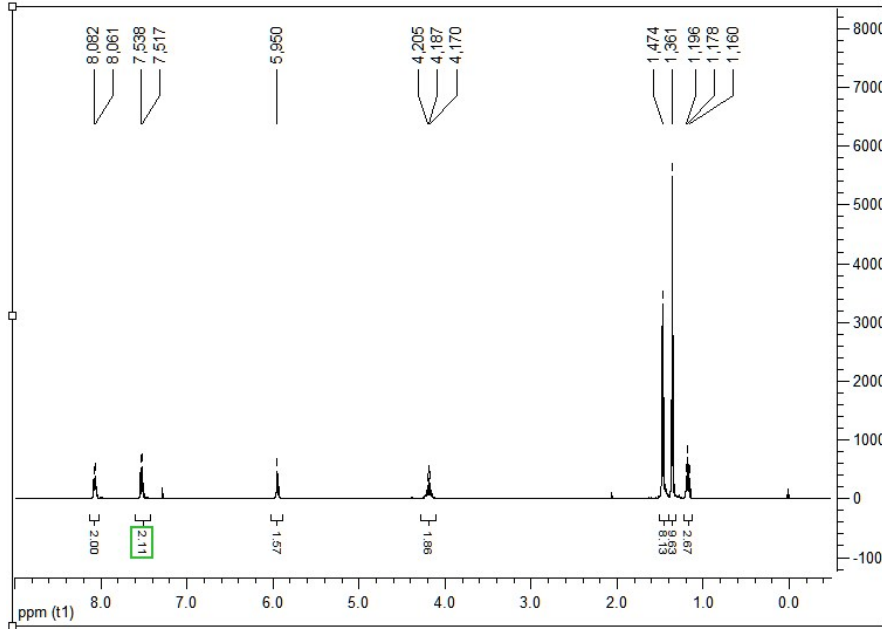

<sup>13</sup>C NMR

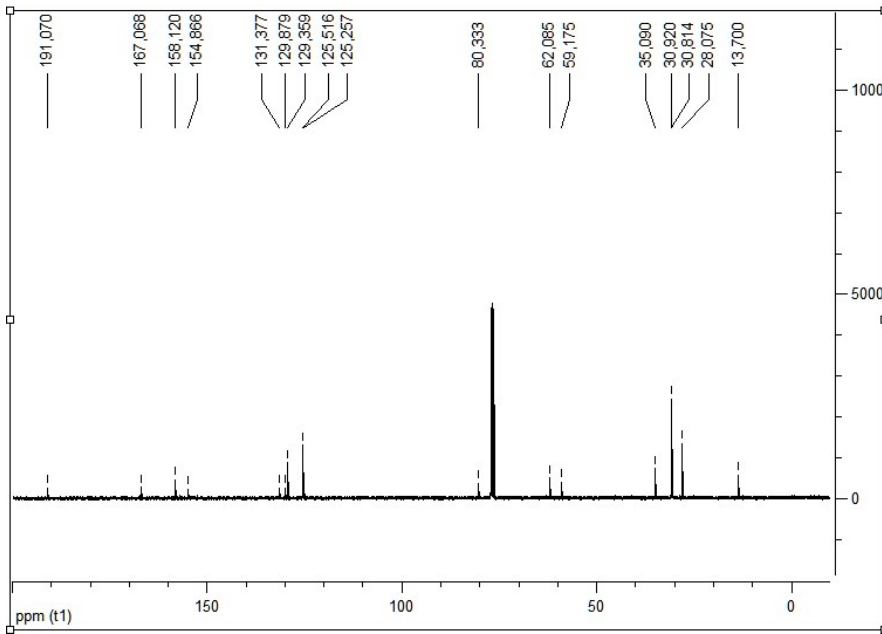

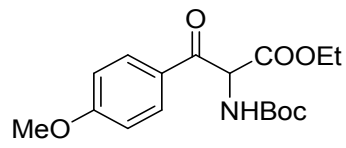

<sup>1</sup>H NMR

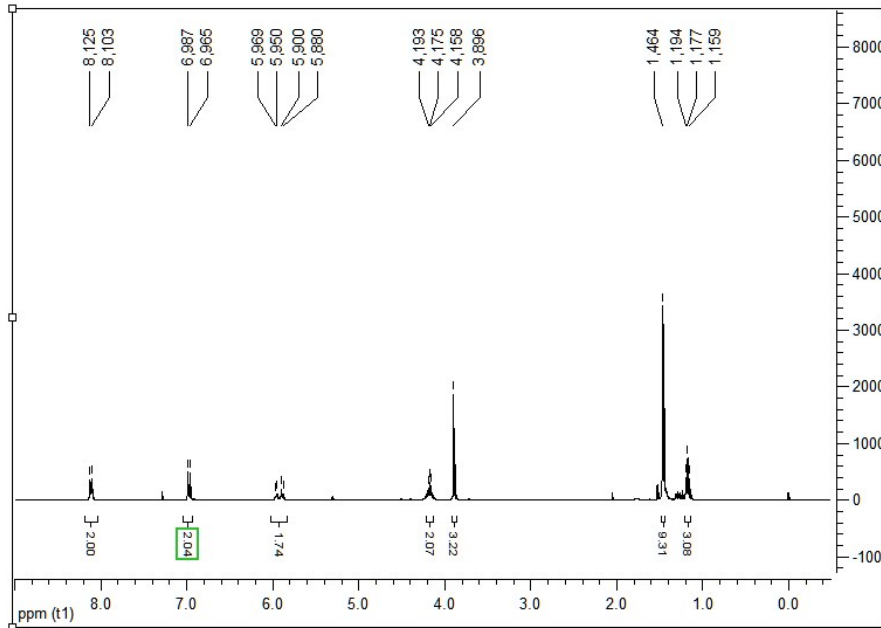

<sup>13</sup>C NMR

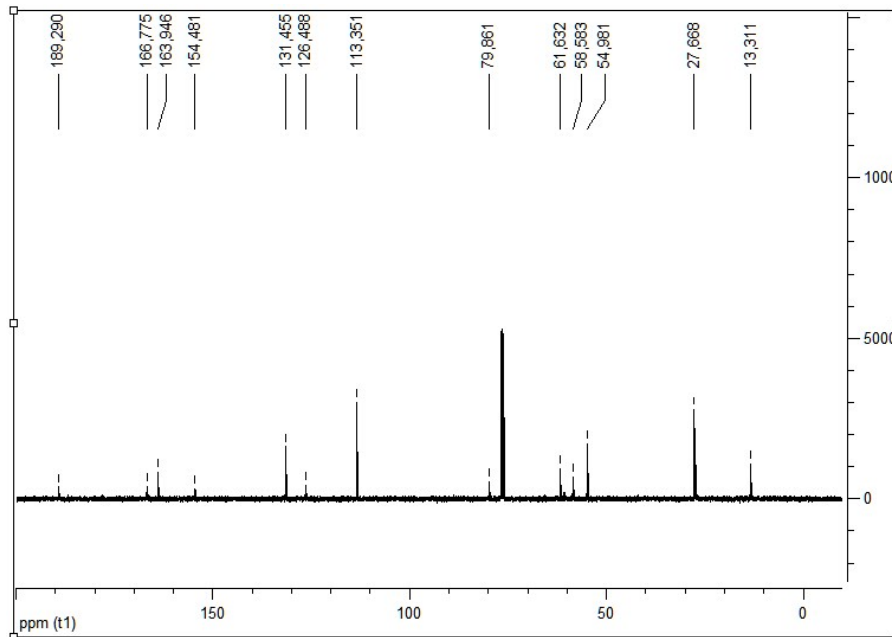

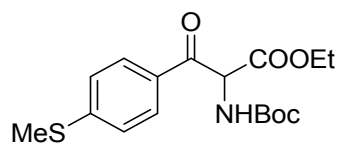

<sup>1</sup>H NMR

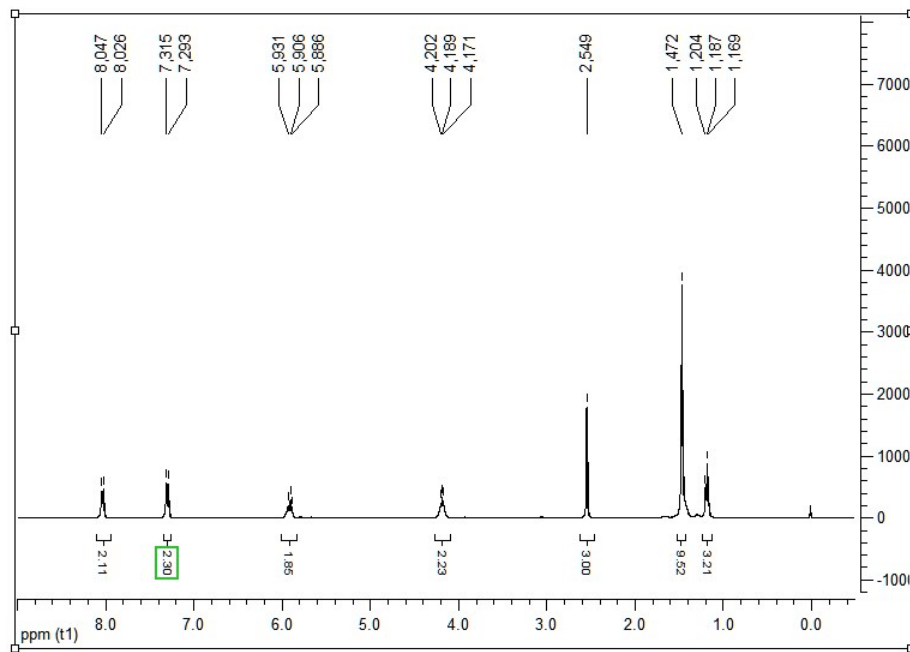

<sup>13</sup>C NMR

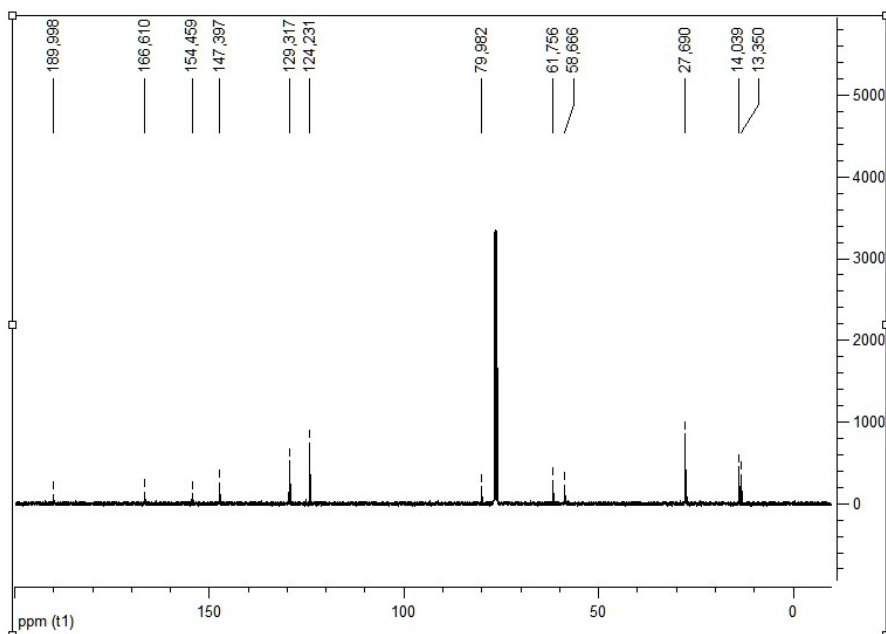



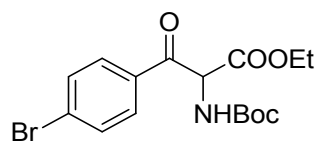

<sup>1</sup>H NMR

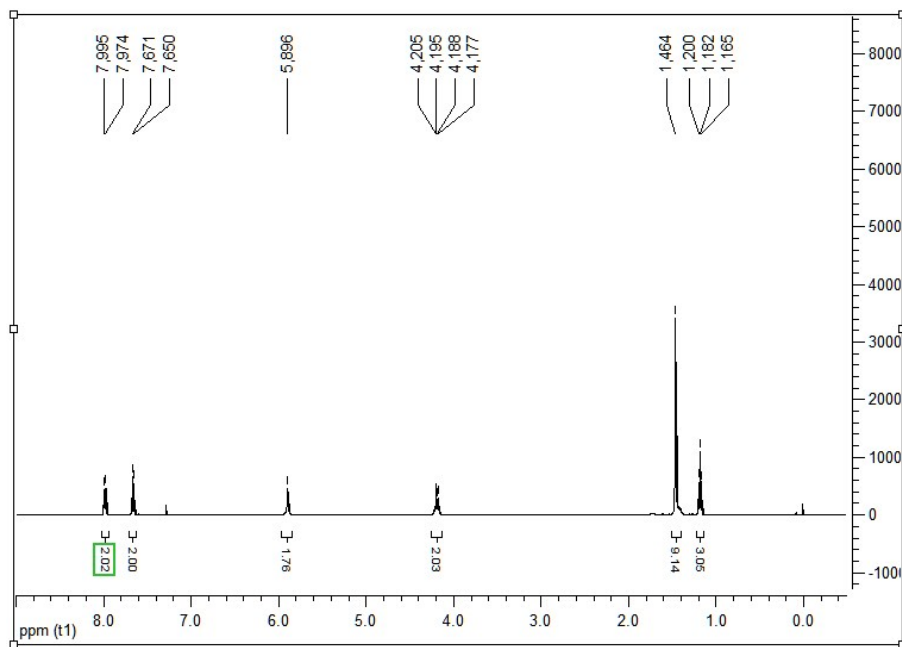

<sup>13</sup>C NMR

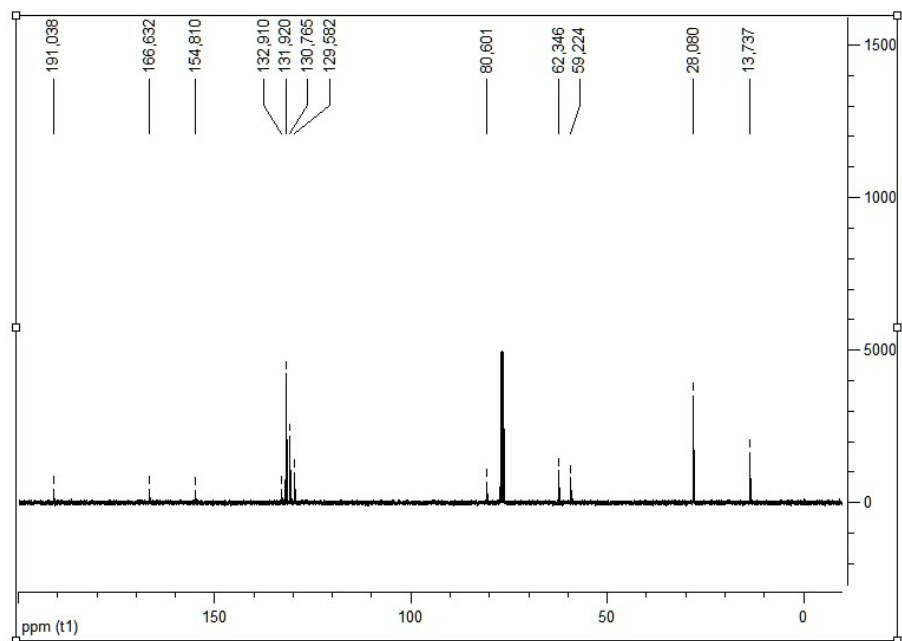

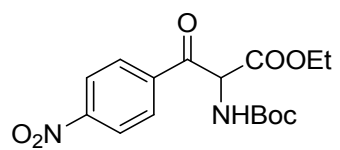

<sup>1</sup>H NMR

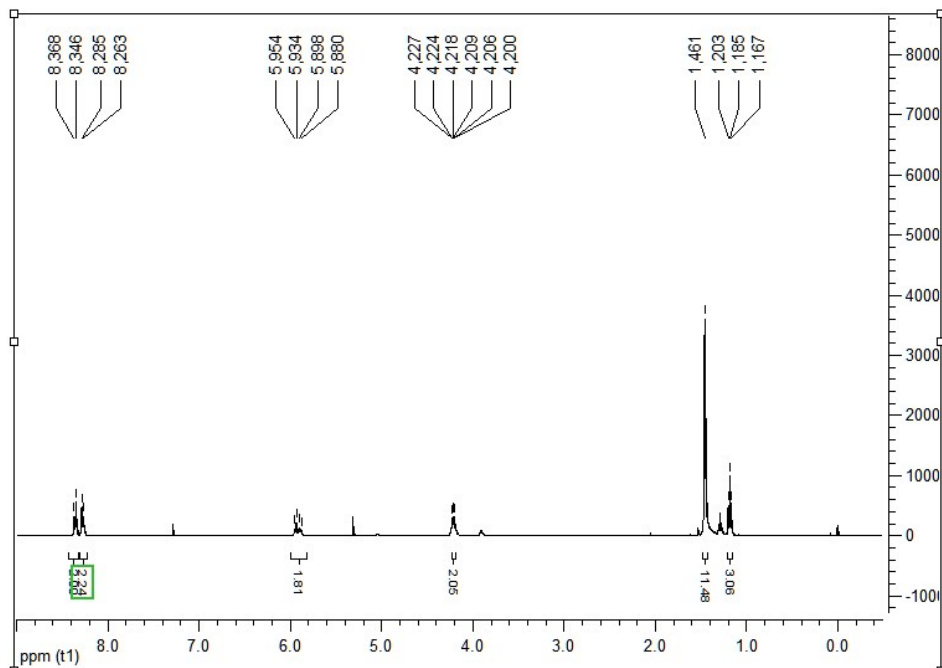

<sup>13</sup>C NMR

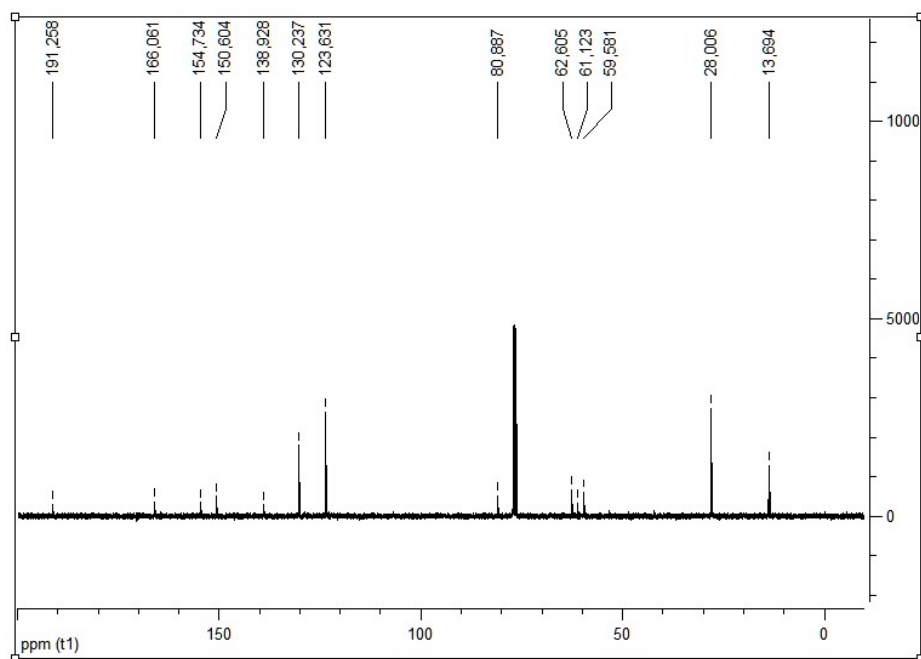

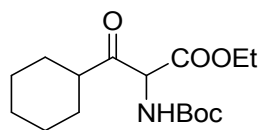

<sup>1</sup>H NMR

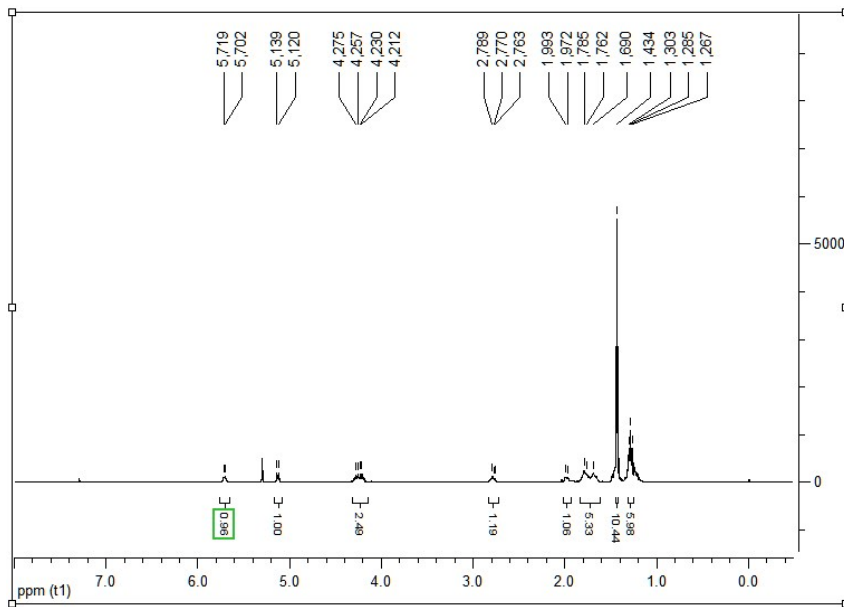

<sup>13</sup>C NMR

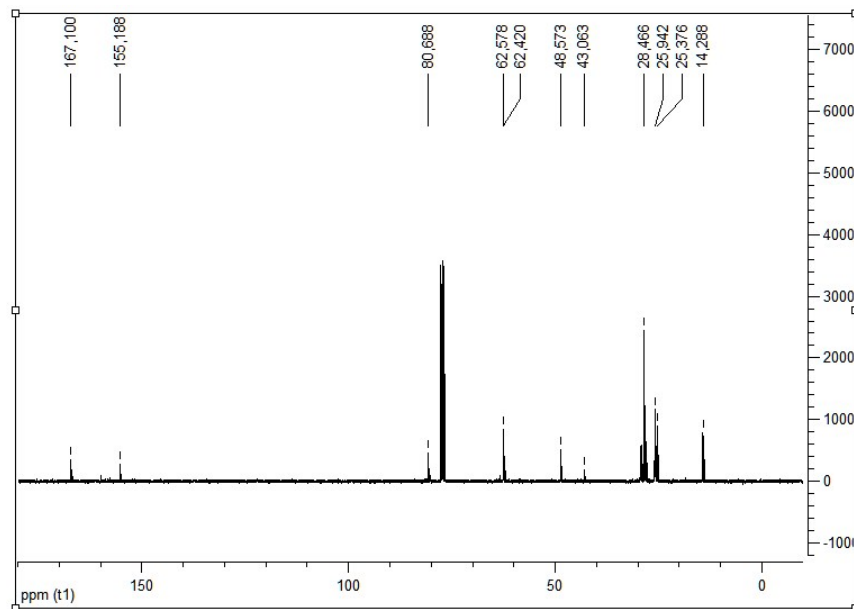

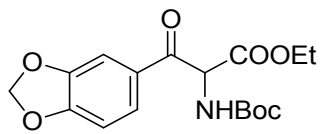

<sup>1</sup>H NMR

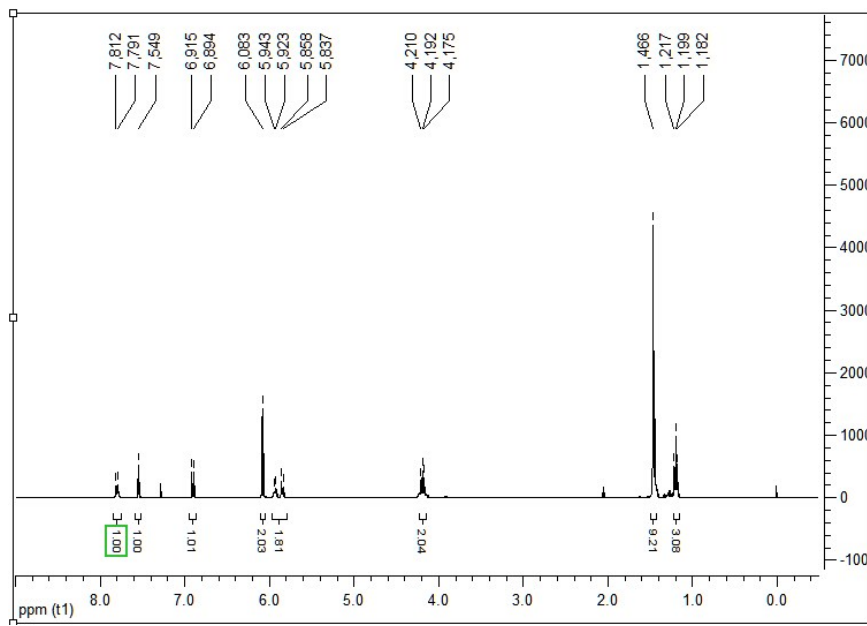

<sup>13</sup>C NMR

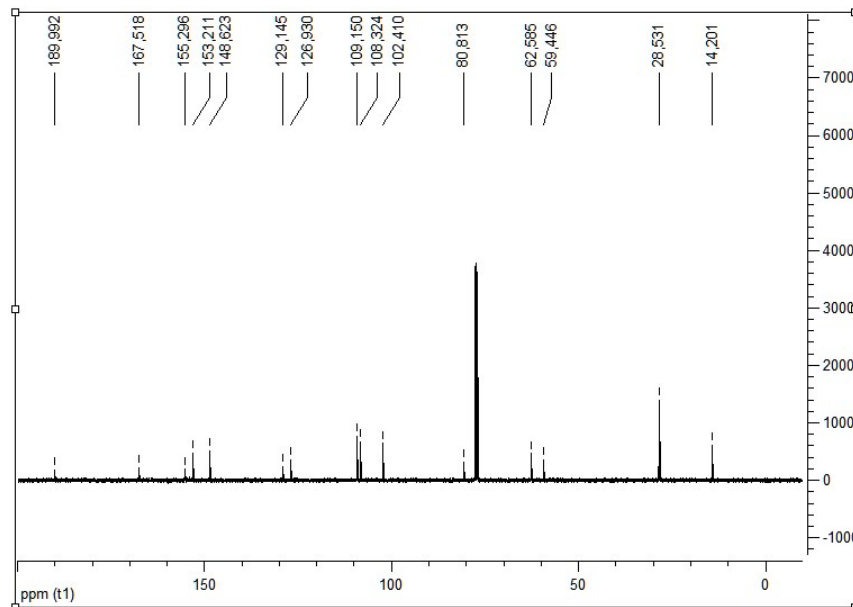

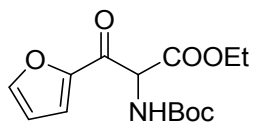

<sup>1</sup>H NMR

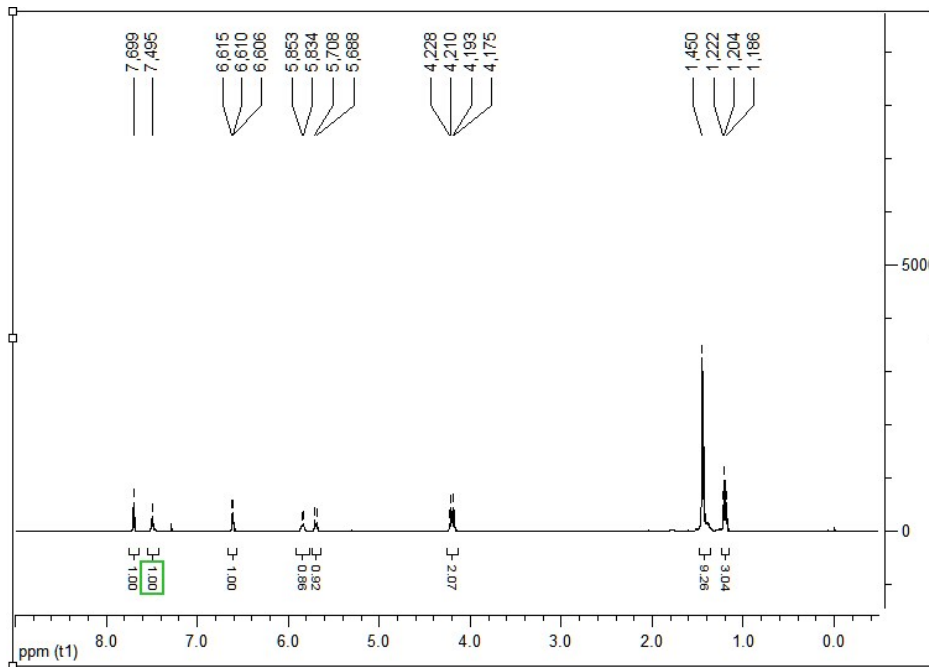

<sup>13</sup>C NMR

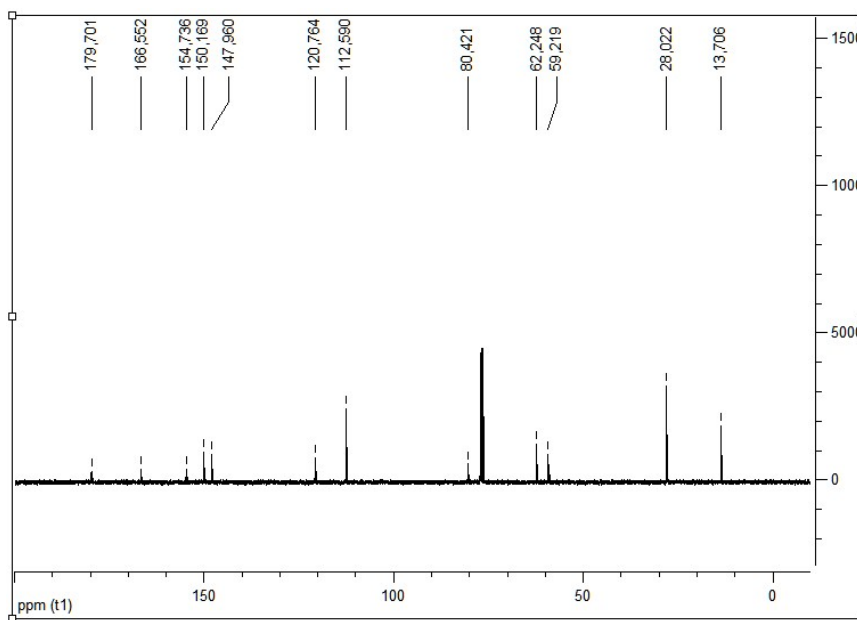

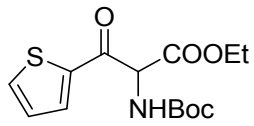

<sup>1</sup>H NMR

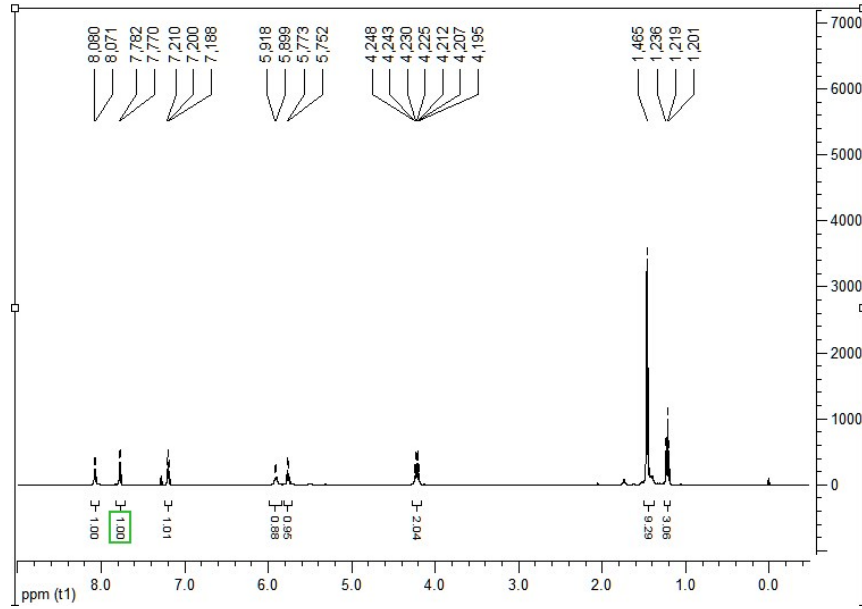

<sup>13</sup>C NMR

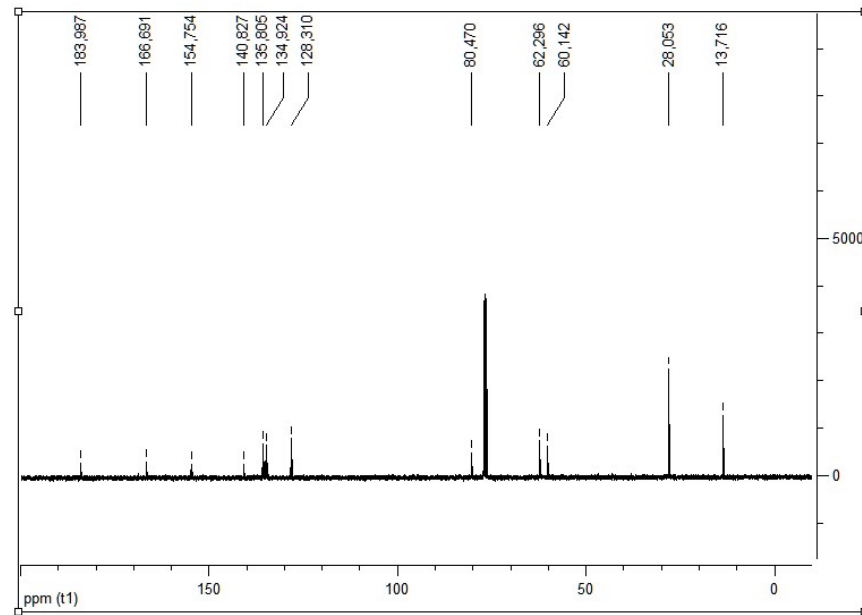

Spectral data of the products (<sup>1</sup>H NMR and <sup>13</sup>C NMR).

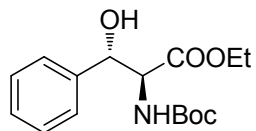

<sup>1</sup>H NMR

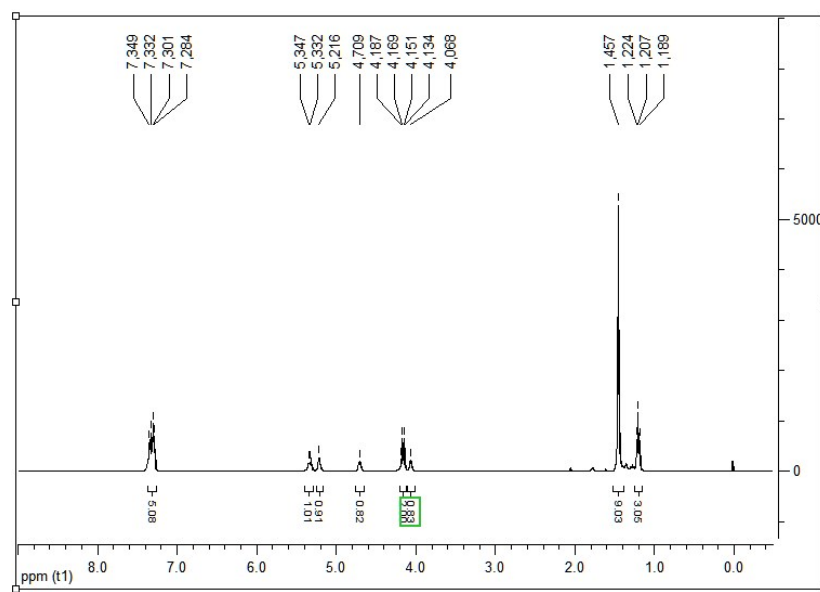

<sup>13</sup>C NMR

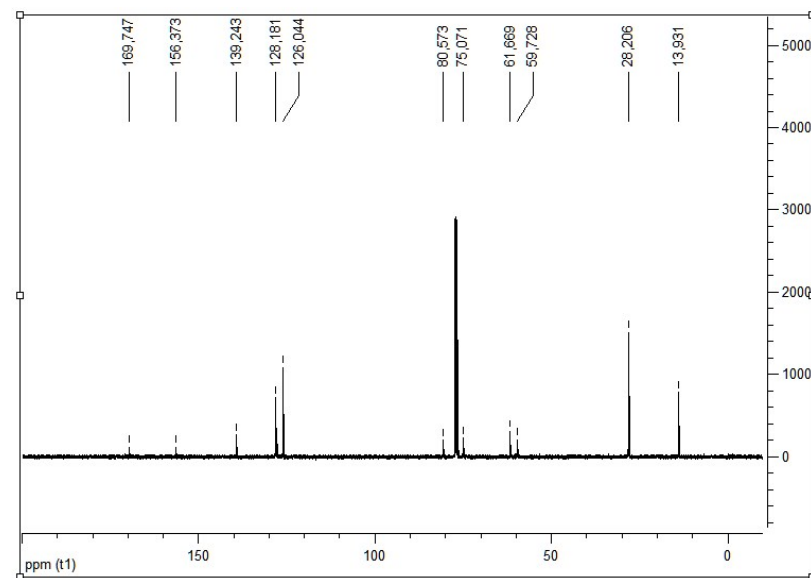

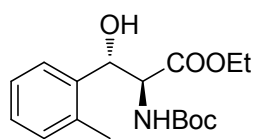

<sup>1</sup>H NMR

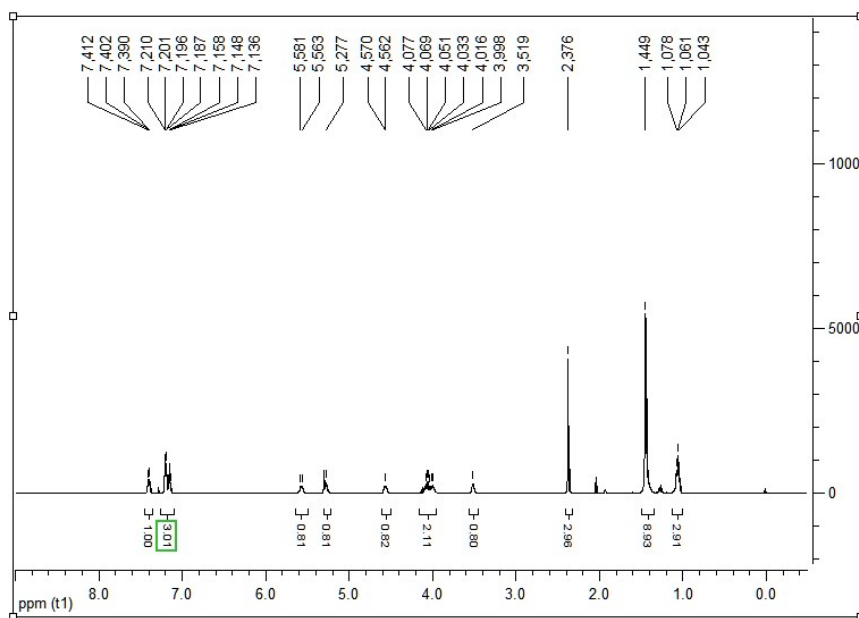

<sup>13</sup>C NMR

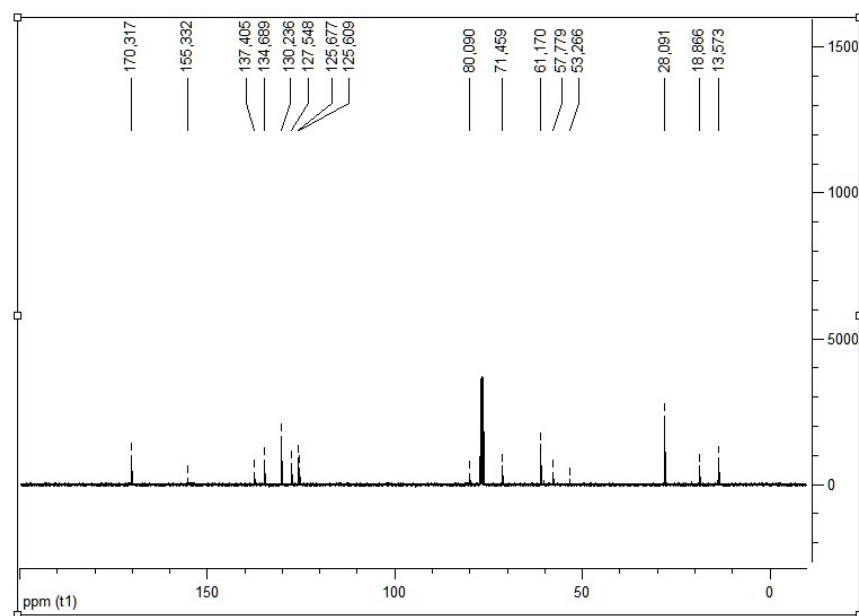



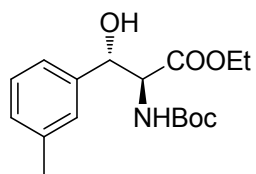

<sup>1</sup>H NMR

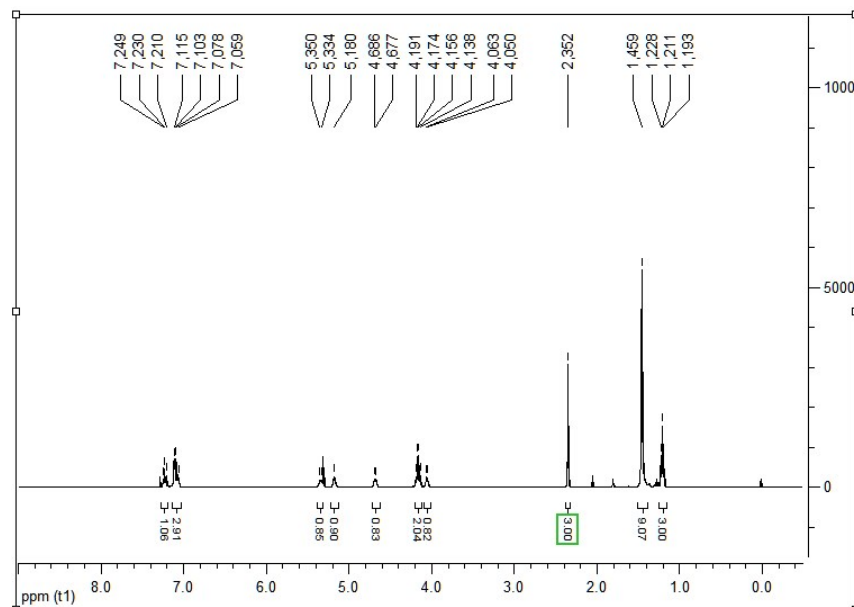

<sup>13</sup>C NMR

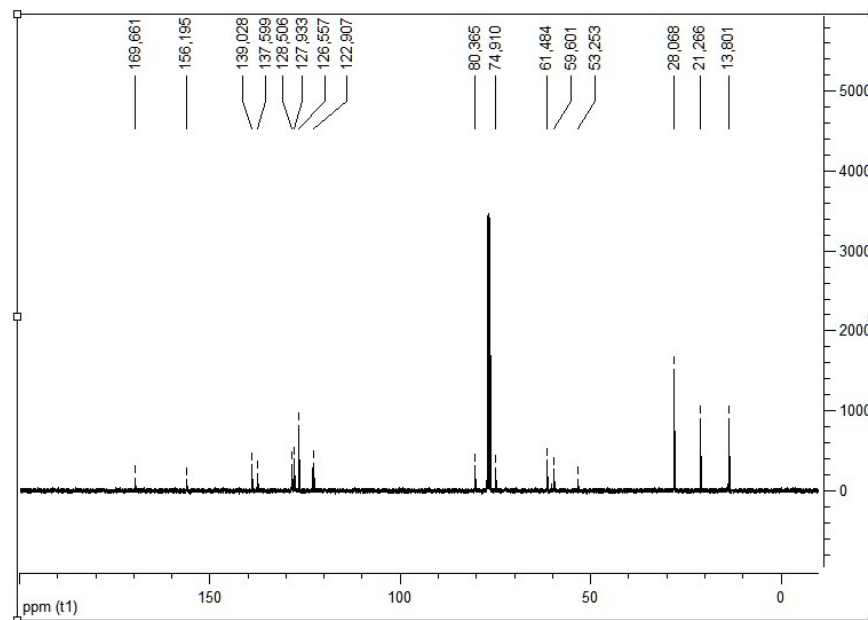

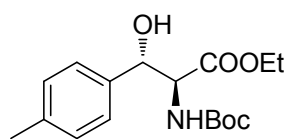

<sup>1</sup>H NMR

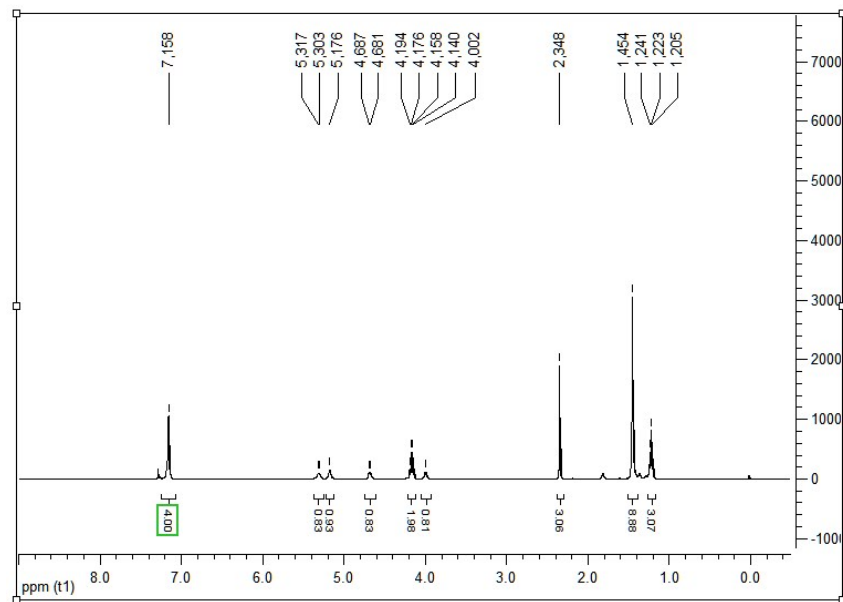

<sup>13</sup>C NMR

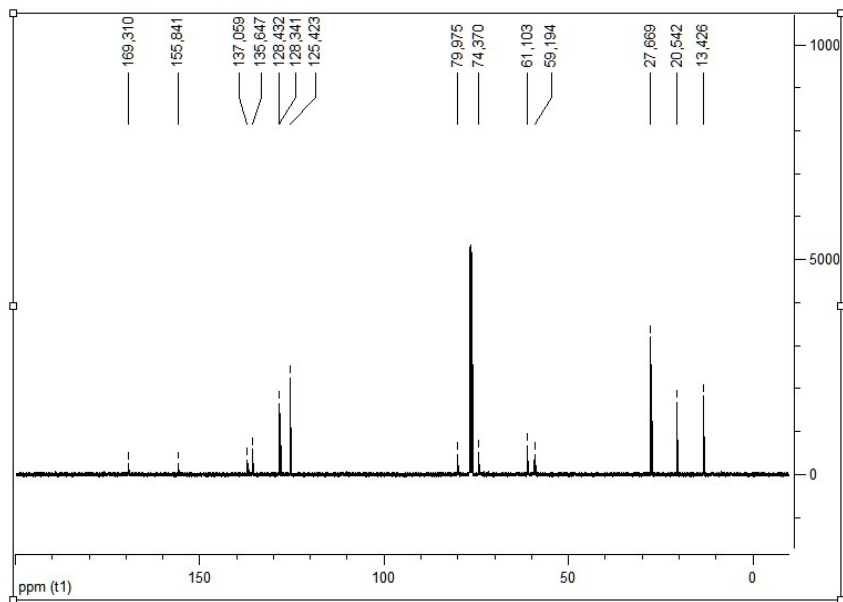

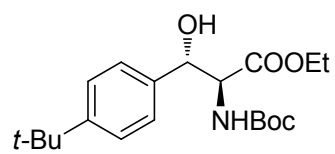

<sup>1</sup>H NMR

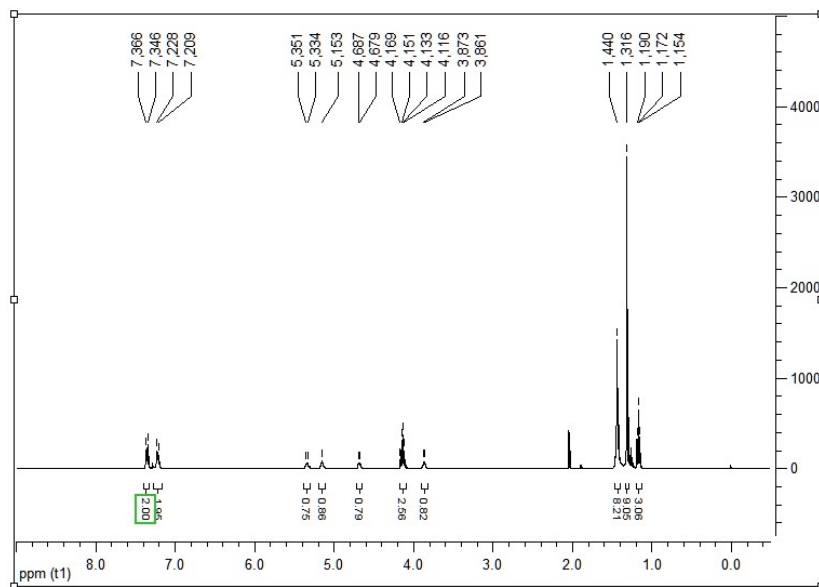

<sup>13</sup>C NMR

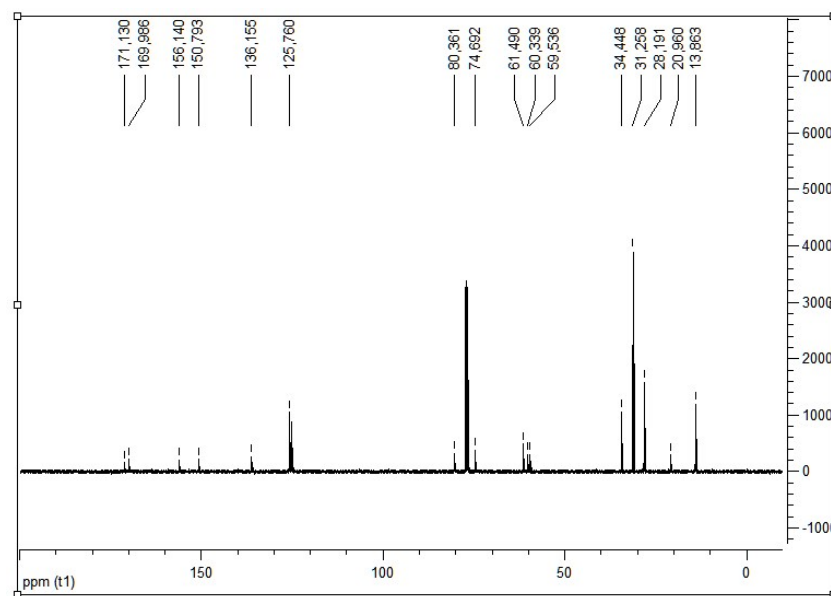

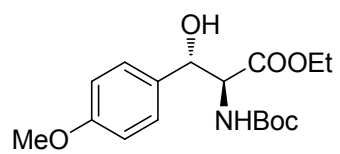

<sup>1</sup>H NMR

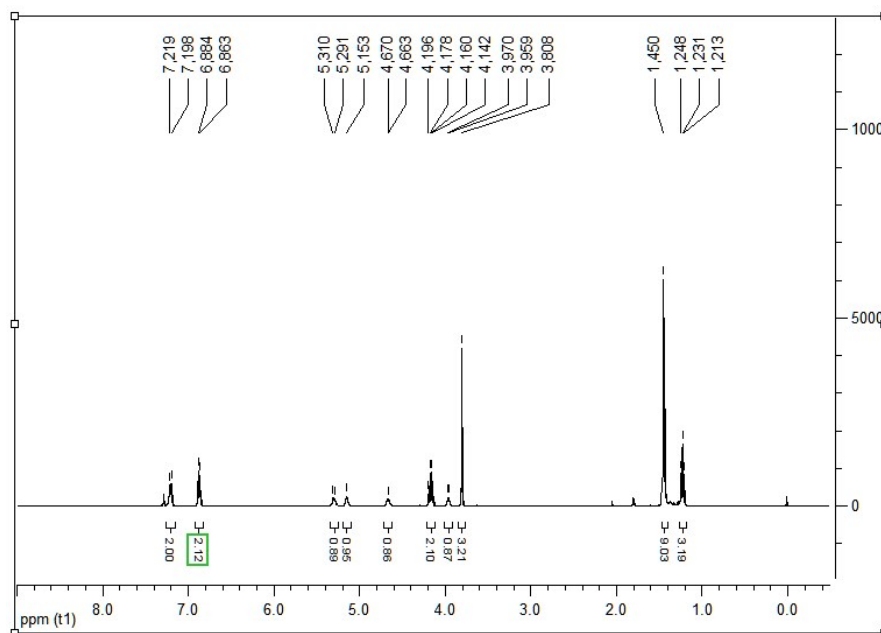

<sup>13</sup>C NMR

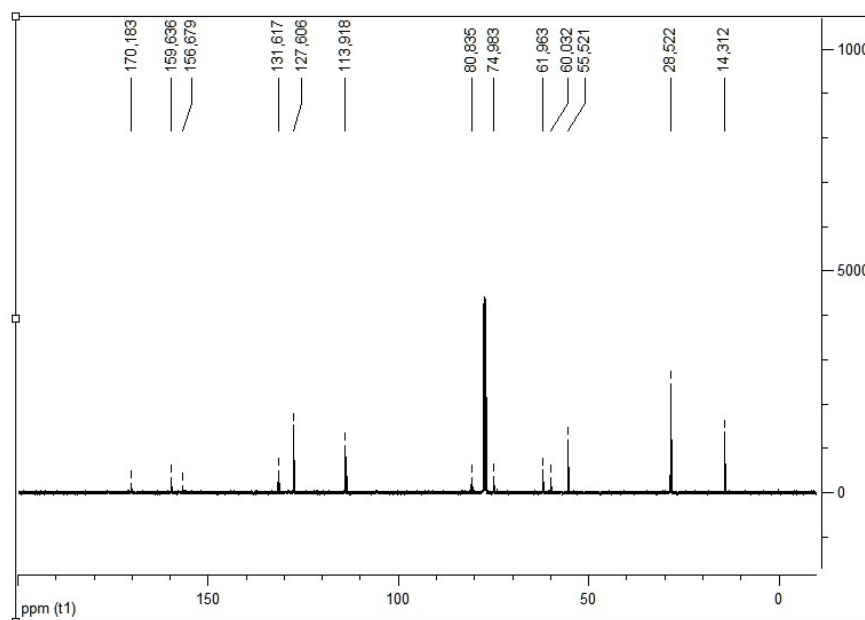

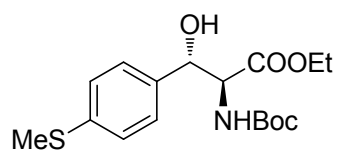

<sup>1</sup>H NMR

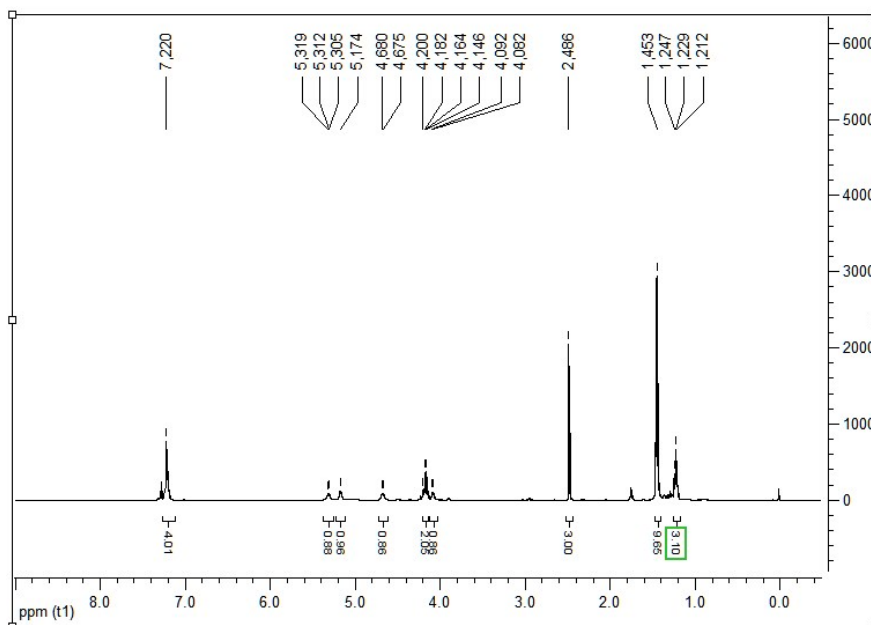

<sup>13</sup>C NMR

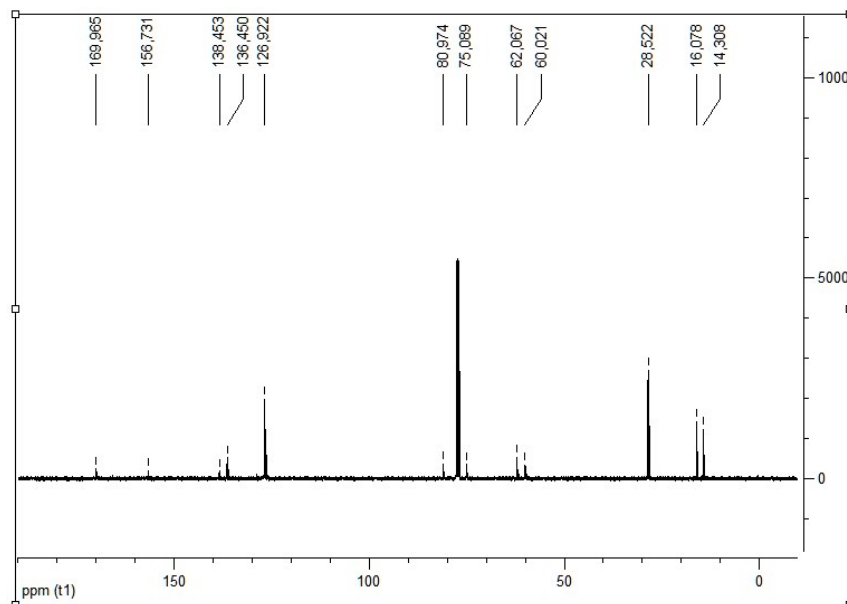

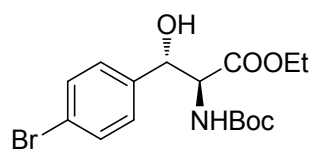

<sup>1</sup>H NMR

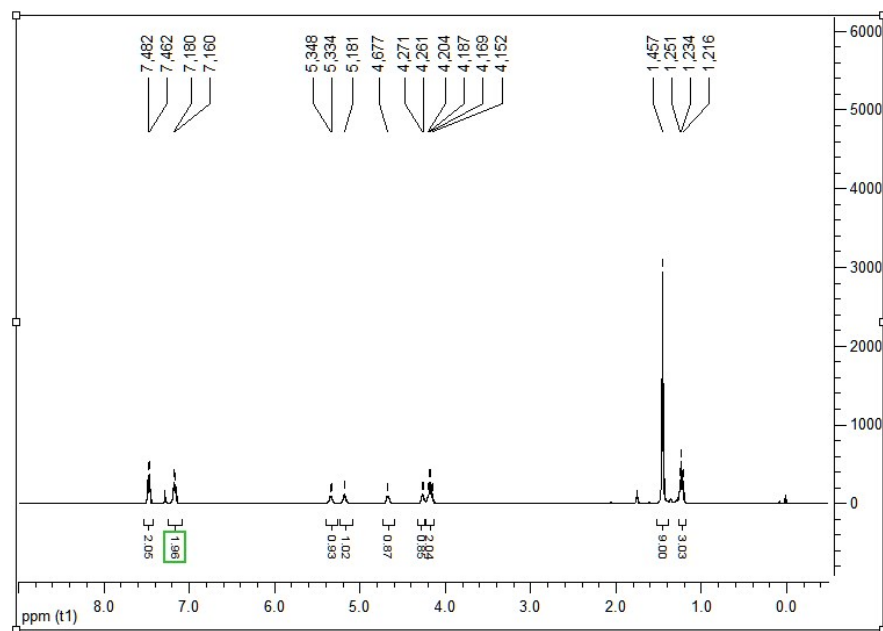

<sup>13</sup>C NMR

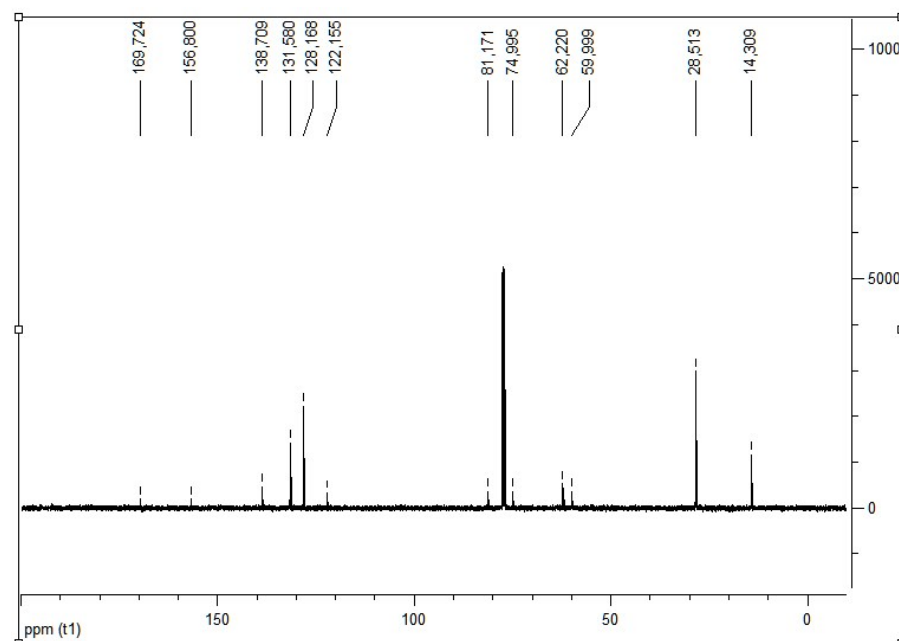

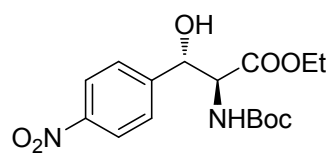

<sup>1</sup>H NMR

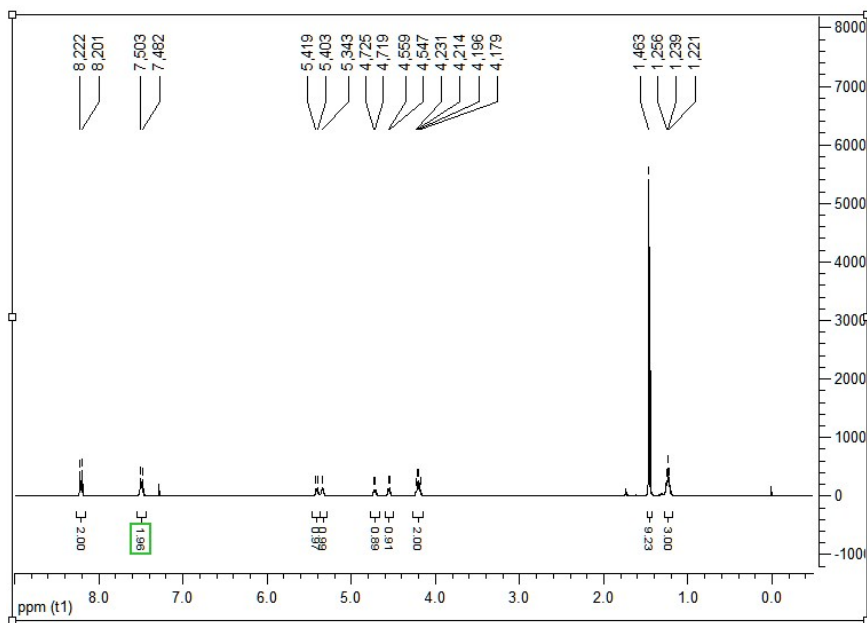

<sup>13</sup>C NMR

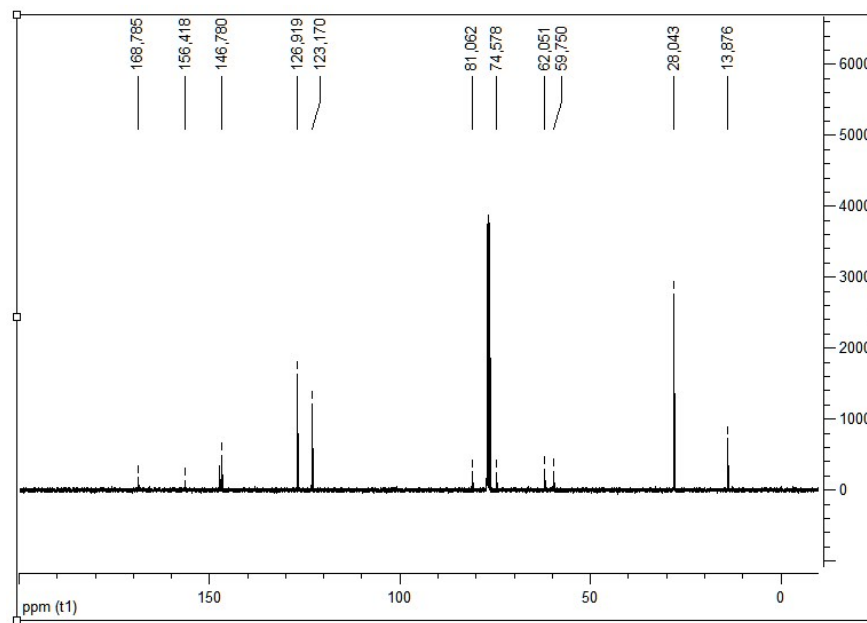

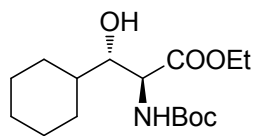

<sup>1</sup>H NMR

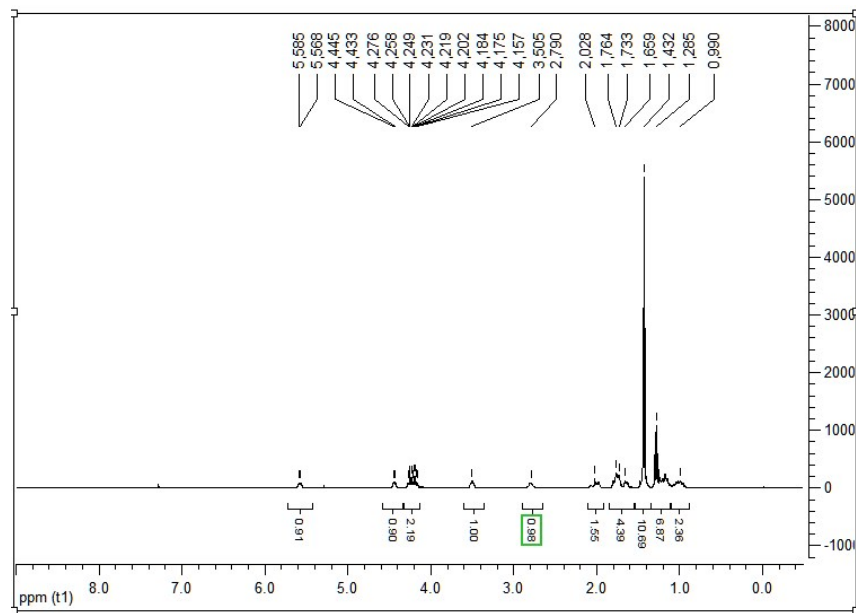

<sup>13</sup>C NMR

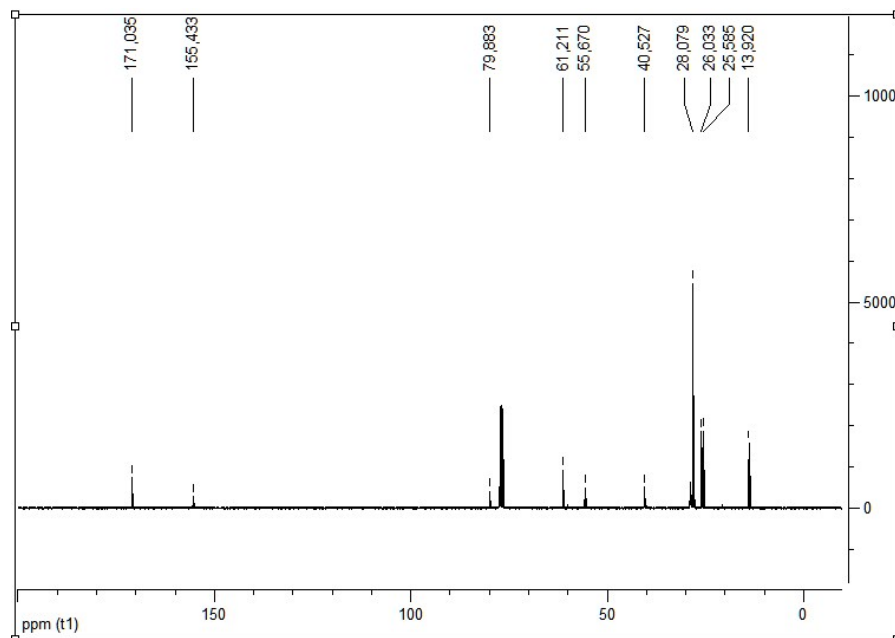





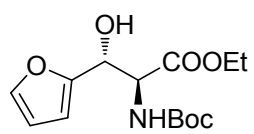

<sup>1</sup>H NMR

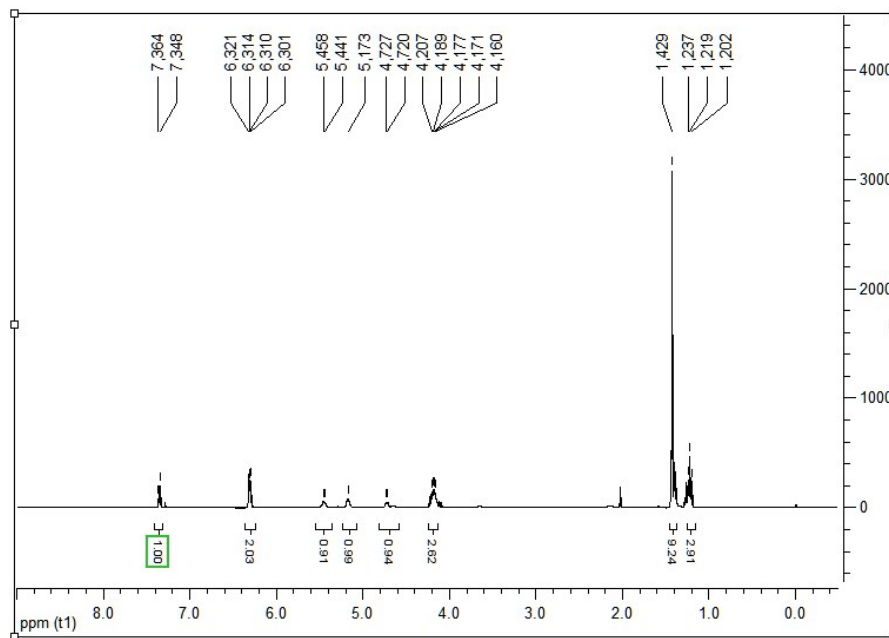

<sup>13</sup>C NMR

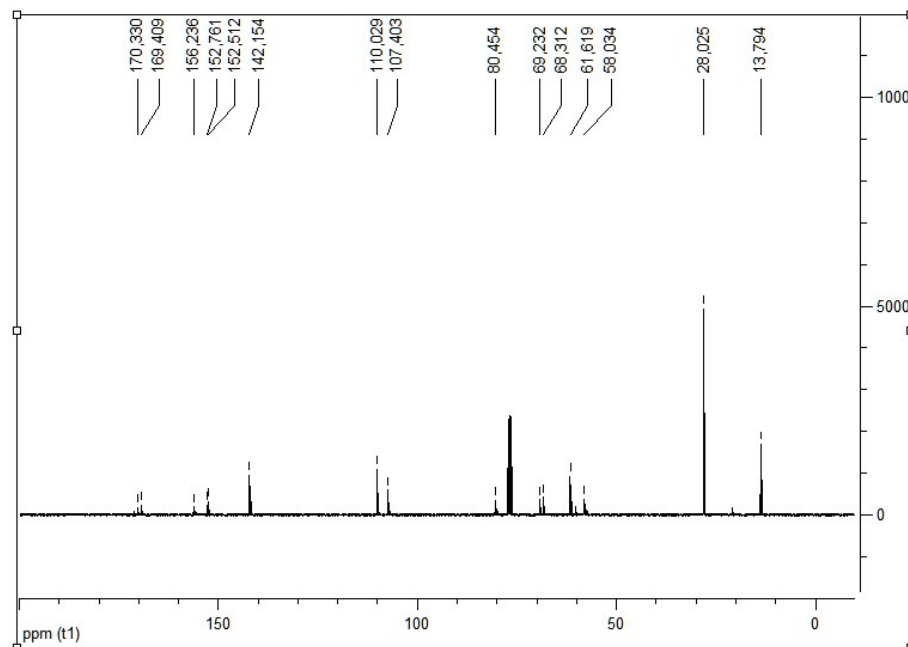

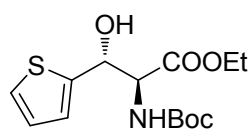

<sup>1</sup>H NMR

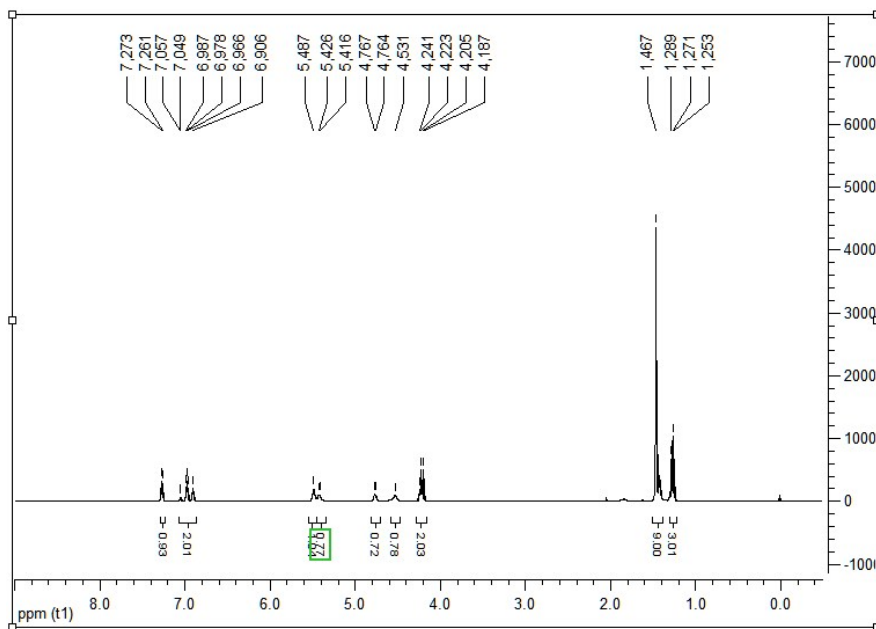

<sup>13</sup>C NMR

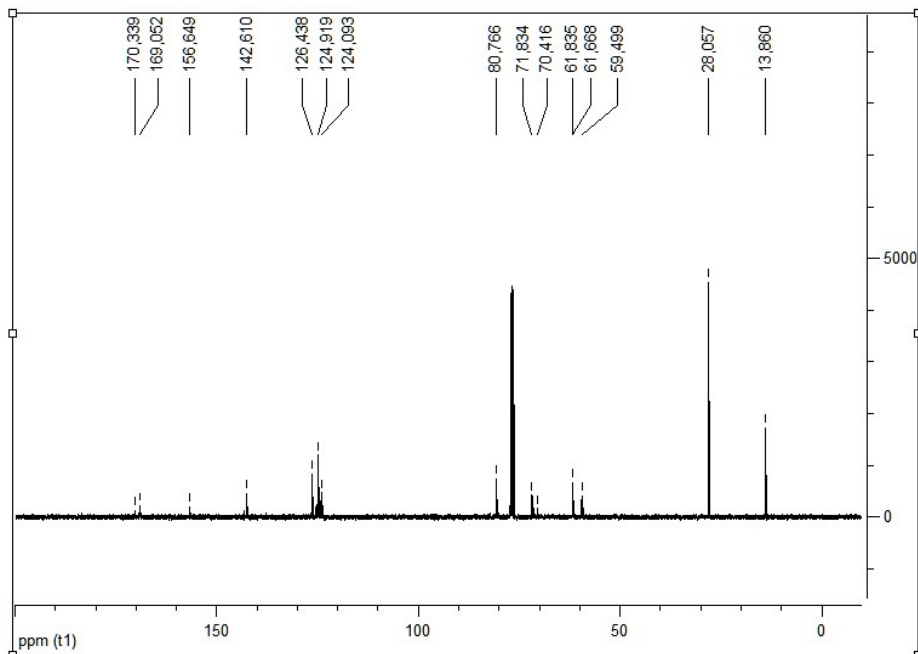

Spectral data of the immediate of vancomycin (<sup>1</sup>H NMR and <sup>13</sup>C NMR).

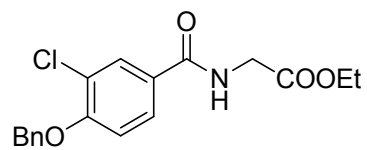

<sup>1</sup>H NMR

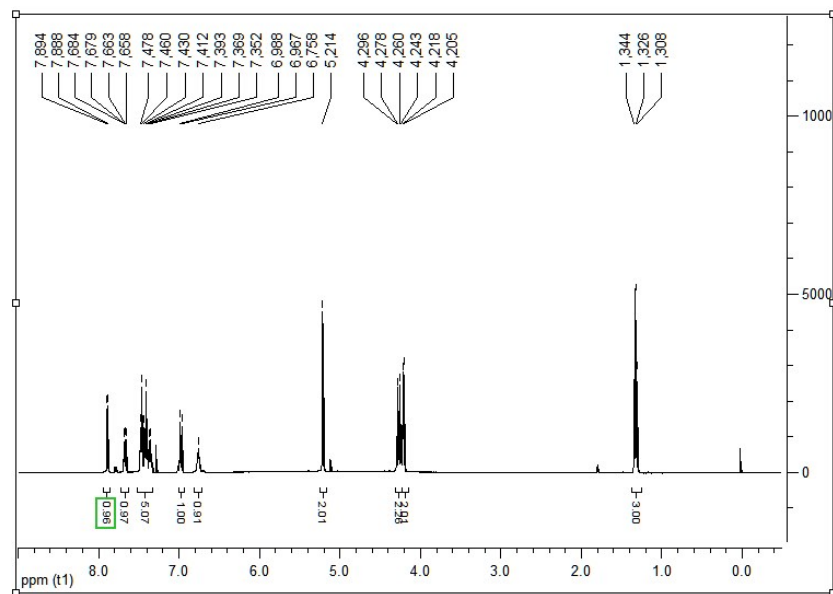

<sup>13</sup>C NMR

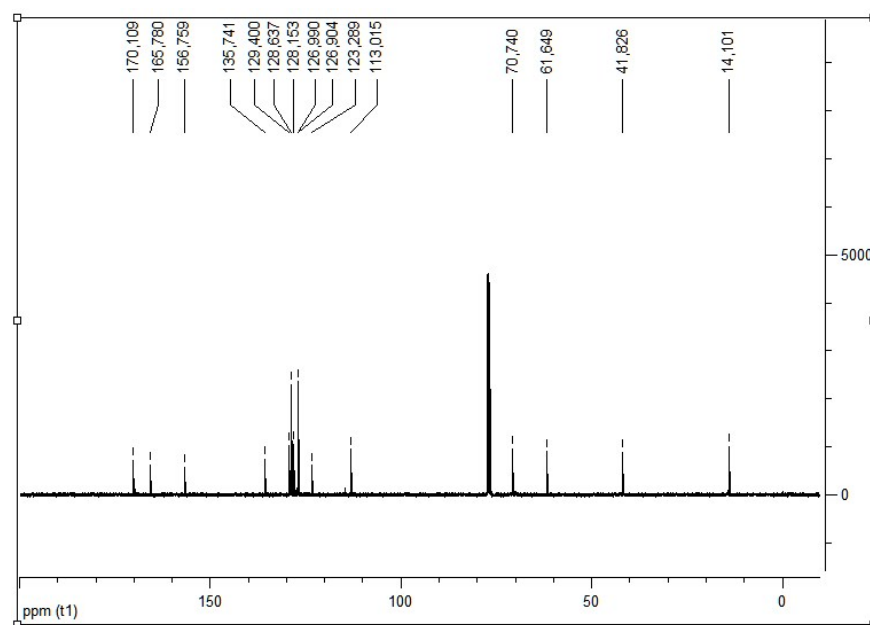

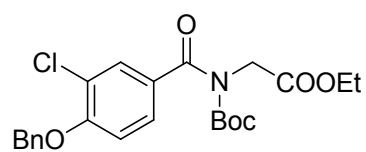

<sup>1</sup>H NMR

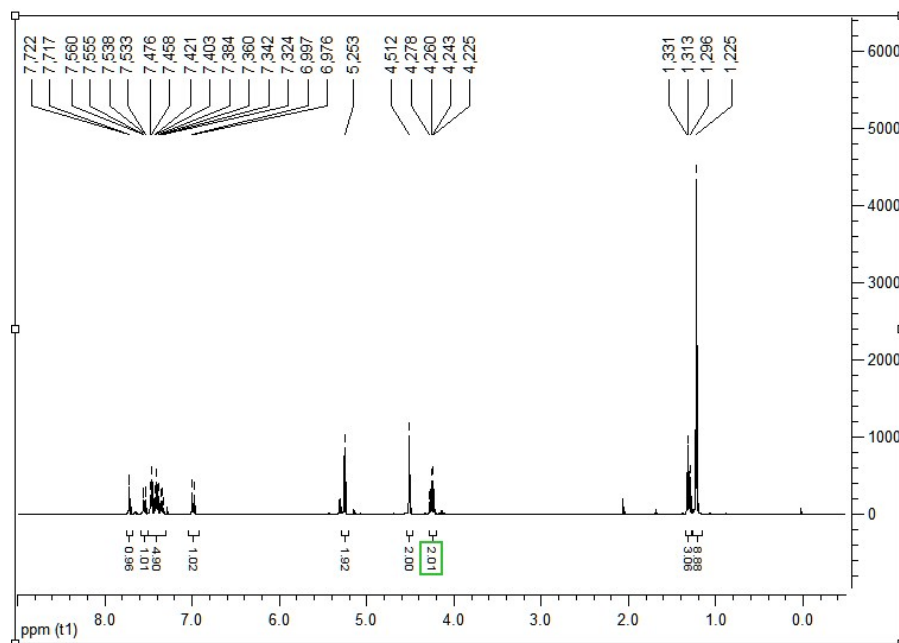

<sup>13</sup>C NMR

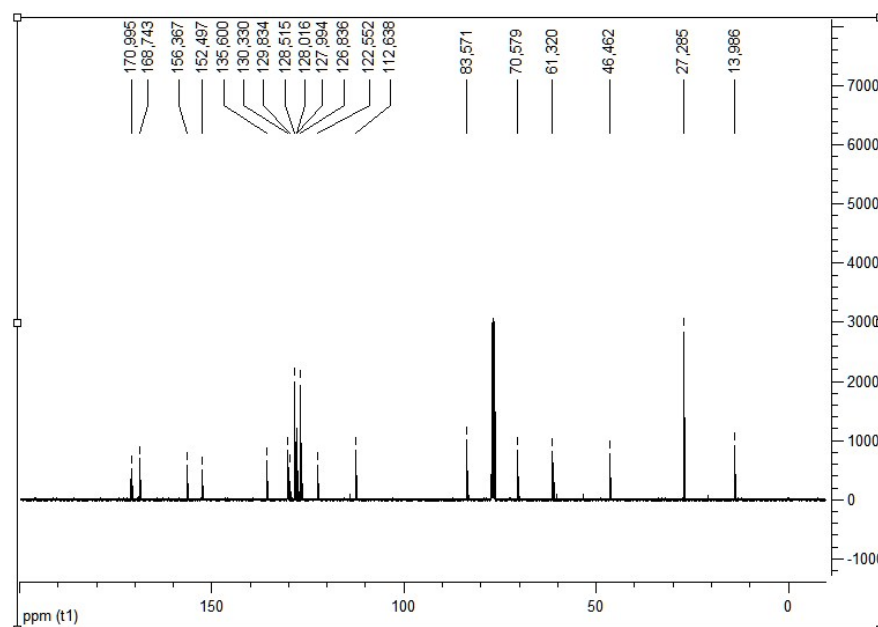

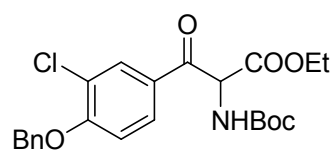

<sup>1</sup>H NMR

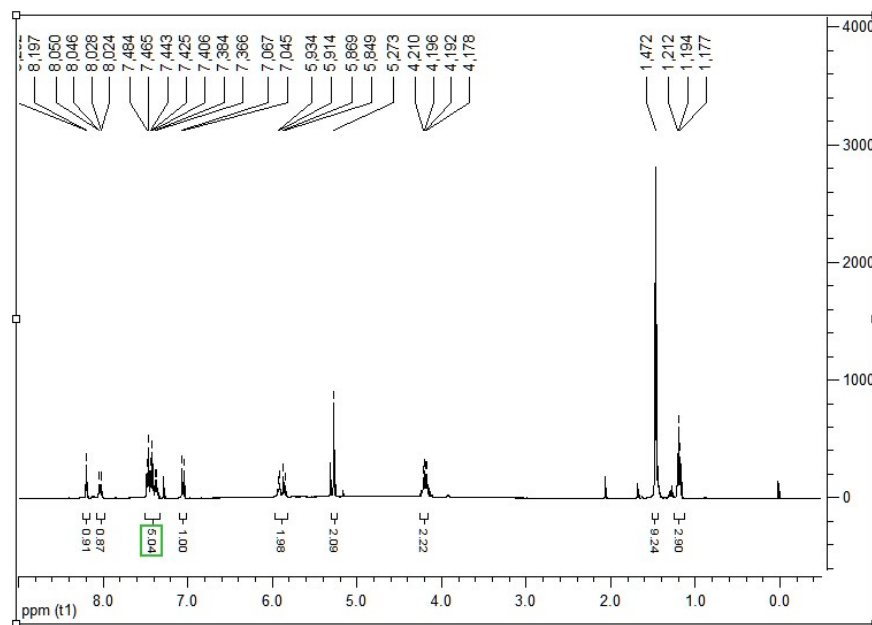

<sup>13</sup>C NMR

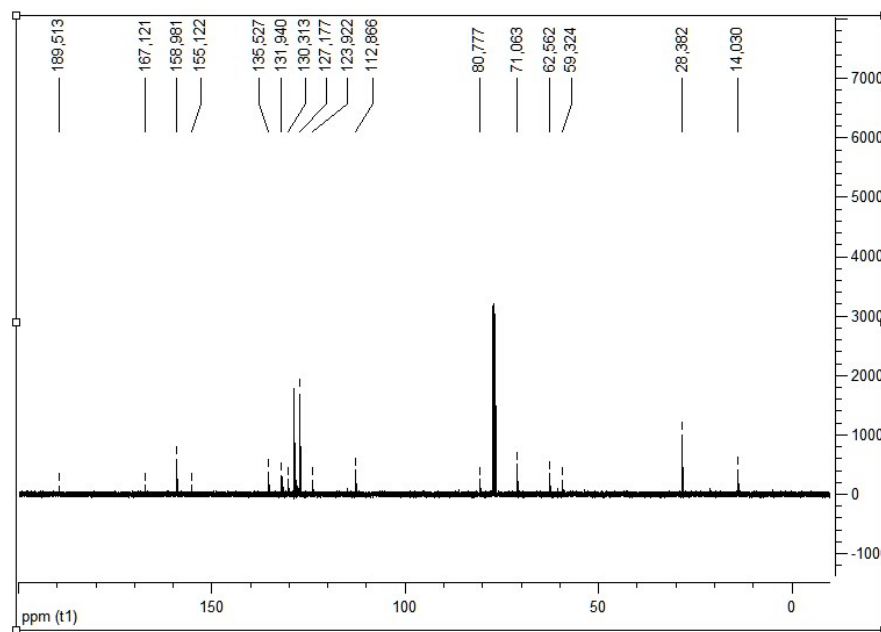

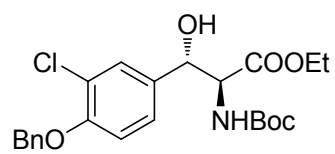

<sup>1</sup>H NMR

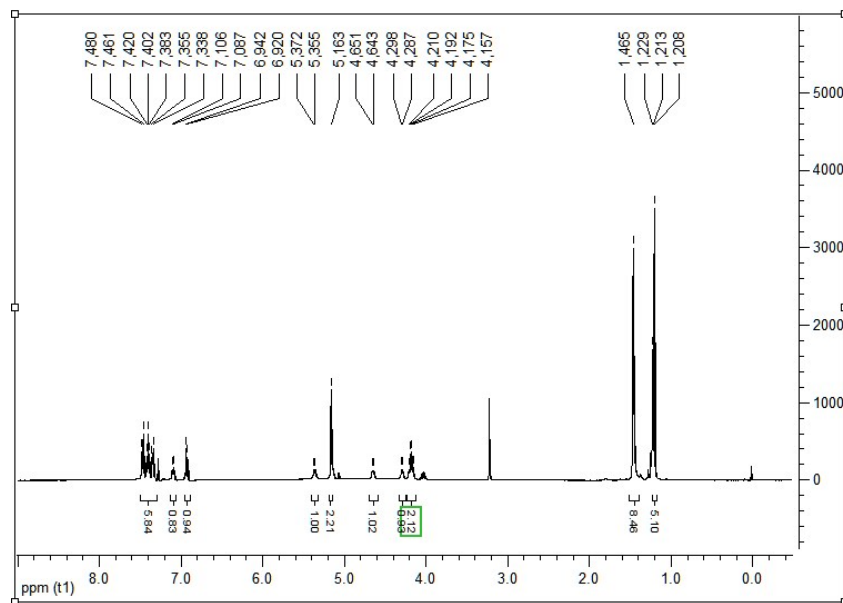

<sup>13</sup>C NMR

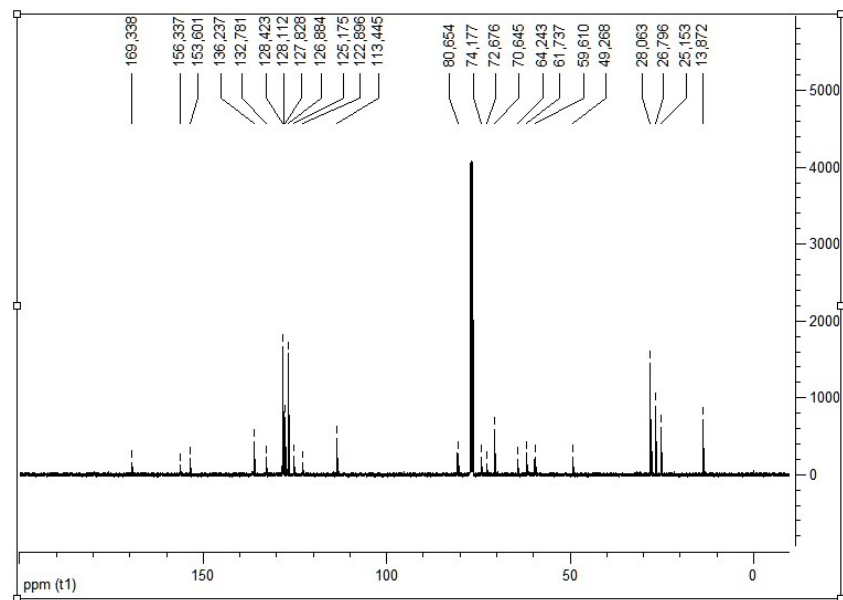

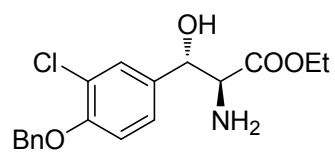

<sup>1</sup>H NMR

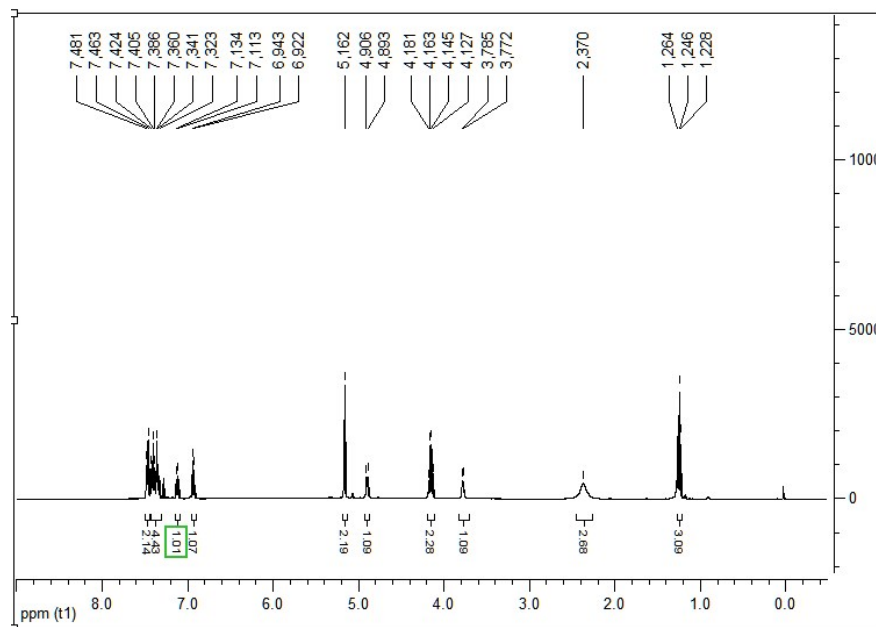

<sup>13</sup>C NMR

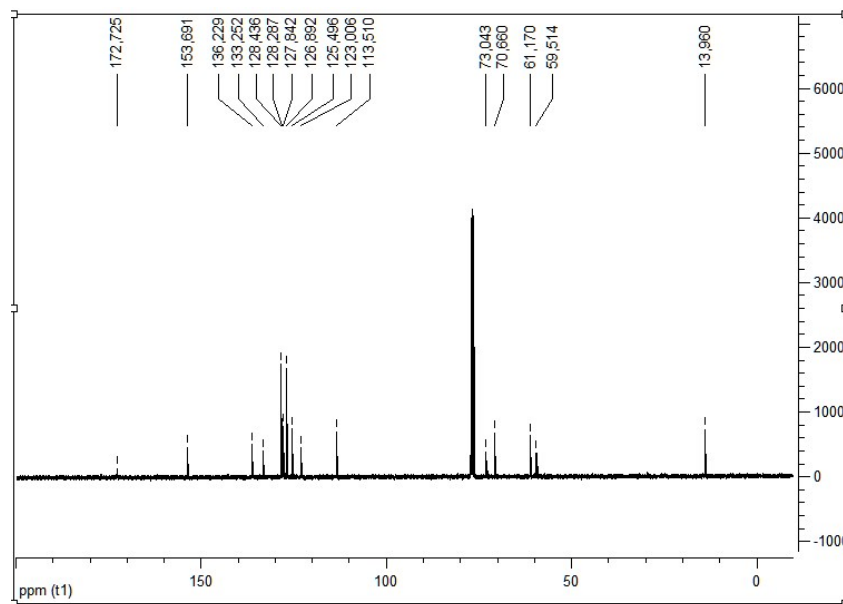



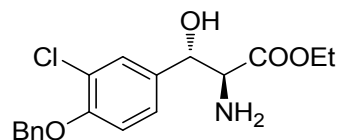

The HPLC of compound **3**

The *anti*-amino alcohol was prepared following Somai's procedures: TsDPEN ligand and  $[\text{RuCl}_2(\text{p-cymene})]_2$  catalyst in  $\text{HCOOH-Et}_3\text{N}$  complex (5:2) at  $45^\circ\text{C}$  for 2 h. (*Org. Lett.* 2010, **12** (22), 5274-5277).

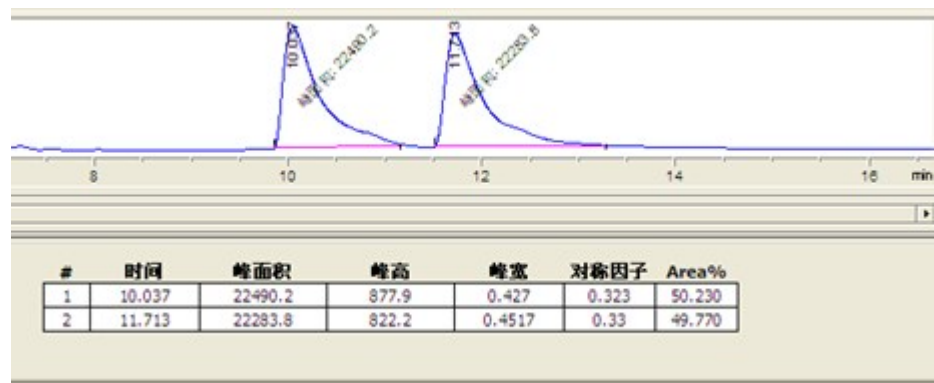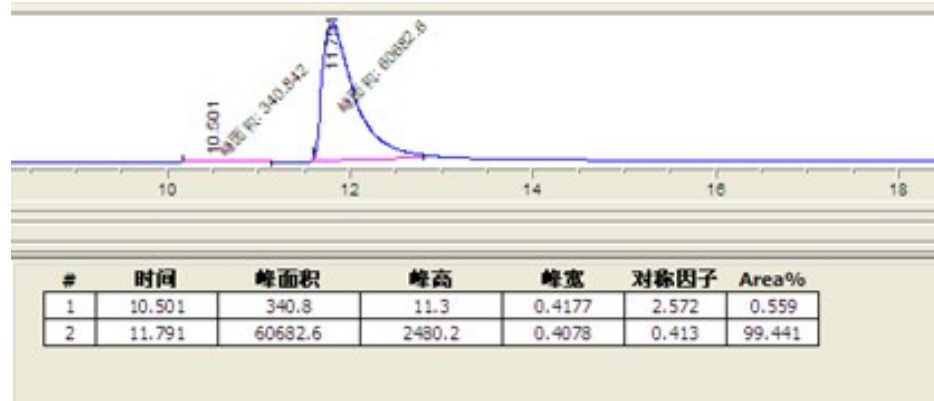

Supplement: c6ra05109j1.pdf [file c6ra05109j1.pdf]
